**Ordered arrangement of dendrites  
within a *C. elegans* sensory nerve bundle**

Zhiqi Candice Yip<sup>1,2</sup> and Maxwell G. Heiman<sup>1,2\*</sup>

**Running title: Dendrite order in *C. elegans***

**Affiliations:**

<sup>1</sup> **Division of Genetics, Boston Children's Hospital, Boston, MA 02115, USA**

<sup>2</sup> **Department of Genetics, Harvard Medical School, Boston, MA 02115, USA**

\*Correspondence to: [heiman@genetics.med.harvard.edu](mailto:heiman@genetics.med.harvard.edu)

## **ABSTRACT**

Biological systems are organized into well-ordered structures and can evolve new patterns when perturbed. To identify principles underlying biological order, we turned to *C. elegans* for its simple anatomy and powerful genetics. We developed a method to quantify the arrangement of three dendrites in the main sensory nerve bundle, and found that they exhibit a stereotyped arrangement throughout larval growth. Dendrite order does not require prominent features including sensory cilia and glial junctions. In contrast, loss of the cell adhesion molecule (CAM) CDH-4/Fat-like cadherin causes dendrites to be ordered randomly, despite remaining bundled. Loss of the CAMs PTP-3/LAR or SAX-7/L1CAM causes dendrites to adopt an altered order, which becomes increasingly random as animals grow. Misexpression of SAX-7 leads to subtle but reproducible changes in dendrite order. Our results suggest that differential expression of CAMs allows dendrites to self-organize into a stereotyped arrangement that readily gives rise to new patterns when perturbed.

## **INTRODUCTION**

Biological systems reflect a remarkable hierarchy of structural organization: proteins assemble into nanometer-scale machines, that in turn build cells, that are then organized and patterned to form structures as complex as the human brain. How do these pieces come together in predictable ways? From first principles, one can imagine a top-down deterministic approach in which the shape, position, and connections of each biological part are specified, similar to an electrical wiring diagram or an architectural blueprint. While this approach is reasonable for simple systems, it breaks down quickly in the face of the complexity we encounter in biology. For example, the human brain consists of over 100 billion neurons and glial cells (Herculano-Houzel, 2009), all of which are precisely connected to form a functioning organ. It is hard to imagine a top-down program that can reliably produce such well-organized brains across a population of individuals.

A powerful alternative strategy for organization is a bottom-up, rules-based approach which has been widely considered in studies of morphogenesis and pattern formation. This type of approach has been called "emergent" organization, because well-ordered patterns emerge from a series of local interactions rather than being specified by a blueprint. For example, Alan Turing's reaction-diffusion mechanism, which consists of an activator molecule that can make more of itself, an inhibitor molecule that inhibits production of the activator, and a mechanism for diffusing these two molecules (Turing, 1990), has been suggested to create the diverse array of biological patterns found in fish stripes (Kondo and Asai, 1995), in seashells (Meinhardt, 1995), and in fur and skin coloration such as those of giraffes and lizards (Manukyan et al., 2017; Walter et al., 1998). A second example of a rule that can generate biological patterns is

differential adhesion, in which biological parts sort themselves based on adhesivity to create elaborate structures and patterns. This concept was first demonstrated in 1955 by Townes and Holtfreter, who dissociated different germ layers of embryonic amphibian cells, mixed them together, and found that these cells re-aggregated and sorted out into layers according to their cell type (Townes and Holtfreter, 1955). Differential adhesion has also been shown to organize nerve bundles in the *Drosophila* visual system (Schwabe et al., 2014). From an evolution standpoint, these emergent, bottom-up strategies may be more advantageous than following a global blueprint, as changes to the starting conditions do not necessarily lead to a disorganized jumble, but instead can give rise to novel well-ordered patterns. For example, we recently showed how altering cell number in the *C. elegans* nervous system gives rise to an emergent, well-ordered pattern of dendrite arbors (Yip and Heiman, 2016).

To identify rules that help to organize cells into other kinds of ordered structures, we decided to study a simple, stereotyped structure in the *C. elegans* nervous system called the amphid sense organ. The amphid contains 12 sensory neurons and two glial cells. Each neuron extends a single unbranched dendrite that terminates at the nose tip in a sensory cilium that senses environmental stimuli (Ward et al., 1975). Together, these dendrites and their associated glial processes fasciculate to form one of four bilaterally symmetric nerve bundles that constitute the sensory structures of the head. These structures were the first portion of the *C. elegans* nervous system to be reconstructed by electron microscopy (Ward et al., 1975). Based on analysis of four animals, Ward and colleagues noted that amphid dendrites appeared to be ordered consistently within the bundle relative to one another, commenting that "Although individual worms are not precise replicas of each other down to the finest details, they are remarkably exact

copies" (Ward et al., 1975). These observations are also consistent with recent EM (Doroquez et al., 2014). Together, the studies show that amphid bundles are remarkably well ordered, yet the problem of how dendrite order arises has not been pursued, largely because of the painstaking methods required to examine it.

In addition to the evidence from these EM studies, we chose to study dendrite order in the amphid for three reasons. First, the amphid bundle is a relatively simple and well-isolated system compared to other bundles of processes in the nervous system, containing only 12 unique and identifiable dendrites with no gap junctions or synapses between them (Doroquez et al., 2014; Ward et al., 1975). Second, the system allows us to easily distinguish defects in fasciculation versus guidance. Amphid dendrites do not grow outwards to the nose from a stationary cell body, but instead form by anchoring to the embryonic nose tip while the cell bodies migrate away together, a phenomenon known as retrograde extension (Heiman and Shaham, 2009). Thus, amphid dendrite fasciculation can be studied independently of outgrowth and guidance. Finally, promoters with single-cell-specificity are readily available for all amphid neurons, allowing us to easily visualize and genetically manipulate any single amphid neuron in live animals.

## **RESULTS**

### **Development of a semi-automated method to quantify dendrite order**

To study the cellular and molecular mechanisms underlying dendrite order in the amphid, we first sought to develop methods to measure, quantify, and compare dendrite order in populations of animals. Ideally, we would label each of the 12 amphid dendrites with a unique fluorescent marker, examine cross sections of the dendrite bundle, and determine how dendrites are ordered across individuals. However, we lacked the technical ability to generate 12 differently colored cell-specific markers and, even if we could uniquely mark each neuron, quantifying the degree of stereotypy of 12 dendrites is a mathematically complex problem. Thus, we decided to simplify the problem by labeling only three dendrites and examining their relative order as a proxy for overall bundle order. We reasoned that, if the overall bundle were well-ordered, then any three dendrites would be similarly well-ordered. Our method can be broken down into three parts: imaging, quantification, and statistical analysis (Fig. 1).

First, we generated a strain to label three amphid neurons in different colors (AWA:YFP, AFD:CFP, ASE:mCherry) by combining two separately integrated transgenes (one with AWA:YFP, the second with AFD:CFP and ASE:mCherry) (Fig. 1A). We used this YFP + CFP/mCherry approach because we consistently observed recombination artifacts when CFP and YFP were introduced on the same transgene. Using traditional widefield deconvolution microscopy to image this strain, we were able to discern the three dendrites despite each dendrite being only about 0.5  $\mu\text{m}$  in diameter, close to our effective resolution limit (Fig. 1A) (Doroquez et al., 2014; Ward et al., 1975).

Next, we sought to quantify the order of dendrites within individual animals (Fig. 1B). To do this, we used a custom MATLAB script that extracts the x-, y-, and z-coordinates of the three dendrites, calculates a centroid line that runs between the three dendrites, and, for each point along the centroid, finds the point on each of the three dendrites that is closest to the centroid (Fig. 1Bi). These three dendrite points define a single cross section (Fig. 1Bii). Thus, independent of any curvature or rotation in the head of a given animal, this approach identifies a series of contiguous cross-sections along the length of the dendrite bundle that intersect the three dendrites exactly once. Each cross section contains a triangle consisting of one ASE, AFD, and AWA dendrite point. We calculated the pairwise distances between these points (Fig. 1Bii).

We used these three pairwise distances to quantify dendrite order in two ways. First, we used the longest pairwise distance as a proxy for bundle width, allowing us to measure how tightly or loosely the dendrites are bundled. To do this, we simply plotted the value of the longest pairwise distance at every point along the bundle (Fig. 1Biii). For example, for the animal shown in Fig. 1, the longest pairwise distance at every point along the length of the bundle is less than 2  $\mu\text{m}$ , suggesting that the dendrites in this animal are tightly bundled together (Fig. 1Biii). Second, we created a categorical variable that describes relative dendrite order by identifying the dendrite "in the middle" of the others at every point along the bundle. A dendrite is considered to be in the middle if it is opposite the longest side of the triangle, i.e. the longest pairwise distance. For example, if the longest pairwise distance is  $d_I$ , which is the distance between AWA (Fig. 1Bii, yellow "A") and ASE (Fig. 1Bii, red "E"), then the dendrite in the middle at that point along the bundle is AFD (Fig. 1Bii, blue "D"). Importantly, this method describes the arrangement of dendrites relative to each other within the bundle, and is not affected by rotation or twisting of

the bundle or head. Next, to visualize dendrite order along the length of the bundle in a single animal, we simply plotted the color of the middle dendrite at each position along the bundle in a column (Fig. 1Biii). For example, for the animal in Fig. 1, the dendrite in the middle is AFD (blue) near the nose tip and then switches to ASE (red) closer to the cell bodies. To visualize dendrite order within a population, we generated a "population plot" by arranging these individual columns side-by-side (Fig. 1Biii).

Finally, we employed a statistical approach based on permutation tests to quantitatively compare the observed dendrite order in a population to a simulated random order (Fig. 1C, see "Statistics" in Methods for additional details including our rationale for choosing this approach). We also used this approach to compare dendrite order between wild-type and mutant populations. In this approach, our null hypothesis is that the two populations are drawn from the same distribution and any differences between them merely reflect sampling error. First, the observed and test populations are compared using a test statistic (we used Fisher's exact test, see Methods) to yield a nominal  $p$ -value. These populations are then computationally merged and re-sampled to create mock populations, and the test statistic is recalculated. Repeating this permutation process (500 iterations) gives a representative set of  $p$ -values for populations that have the same composition as our true samples but, by definition, differ only by sampling error. This approach yields 501  $p$ -values (1 true  $p$ -value + 500  $p$ -values from resampling) for each point along the length of the dendrite bundle. The percentile rank of the true  $p$ -value at each point is plotted using a log-scale color bar (Fig. 1Cii). Darker colors indicate a low rank, meaning that the observed dendrite order is significantly different from the test distribution.



To summarize, we have developed a robust and semi-automated pipeline to detect, quantify, and compare dendrite order, which now allows us to determine dendrite order in a wild-type population and to ask whether it is altered by various manipulations.

### **Amphid dendrites are fasciculated and ordered**

To determine wild-type dendrite order, we imaged animals expressing CFP, YFP, and mCherry in AFD, AWA, and ASE respectively. Animals were synchronized at the first larval stage (L1) and then collected and imaged at three time points (24h, early larval stage (L2/3); 48h, late larval stage (L4); 72h, one-day adult). We found that dendrites are tightly fasciculated throughout larval growth (Fig. 2A) (average longest pairwise distance  $\pm$  standard deviation: 24h,  $0.88 \pm 0.09 \mu\text{m}$ ; 48h,  $1.11 \pm 0.22 \mu\text{m}$ ; 72h,  $1.51 \pm 0.25 \mu\text{m}$ ). The approximate doubling in bundle width may reflect an increased diameter of each dendrite and thus the entire bundle, and roughly corresponds to the overall doubling in length of the head during these stages.

Next, we looked at dendrite order across the population (Fig. 2B,C). We visualized dendrite order using population plots as described above (Fig. 2C) as well as summary plots that represent the fraction of animals with the ASE, AWA, or AFD dendrite in the middle at every point along the bundle (Fig. 2B). The summary plot provides a compact way to visualize how well-ordered dendrites are in a population. If all of the lines converge at 0.33 then it indicates that dendrite order is random for that population, whereas if any of the lines approach 1 or 0 then it suggests that dendrites are arranged in a consistent, non-random order.

We found that amphid dendrites are well-ordered, especially in younger animals (Fig. 2B, C;

left plots). To quantify the degree of order, we compared our observed samples to a simulated random sample using a permutation test (Fig. 2B, blue bars) as well as a chi-squared test (Supp. Fig. S1A, see Methods). Interestingly, although dendrite order is stereotyped, it is not uniform along the length of the bundle. Instead, it exhibits a switch point, which itself is stereotyped (Fig. 2B, C). Close to the nose tip, AFD (blue) is predominantly in the middle, but following the switch point, ASE (red) takes over as the middle dendrite for the rest of the length of the bundle. AWA (yellow) is rarely in the middle, and only for short segments (Fig. 2B, C). This order is maintained throughout larval development, although it becomes increasingly "noisy" with age. We further confirmed these results by showing that a different set of three amphid dendrites (AWA, YFP; AWC, CFP; ASG, mCherry) are also well-ordered and exhibit a similar switch point (Supp. Fig. S1B).

The cause of the switch point is unclear. Similar discontinuities were observed in other bundles by classical EM, and it was noted that "abrupt changes in neighbourhood exhibited by some neurons" might arise from mechanical obstacles in the local environment or from changes in the composition of the bundle (White et al., 1986). Indeed, examination of classical EM sections reveals changes in the overall shape of the bundle along its length, switching from a cylinder to a sheet as it is pressed against the basement membrane of the pharynx closer to the nose (Supp. Fig. S1C) (Altun and Hall, 2005). The composition of the bundle also changes along its length. The neuron AUA extends a dendrite in the posterior portion of the bundle that does not reach the nose, while the amphid socket glial cell extends a process that fasciculates with only the anterior portion of the bundle (Ward et al., 1975). We measured the average positions of the AUA dendrite ending and the amphid socket glial cell, and found the position of the switch

point does not correlate with the AUA ending, but does correlate with the position where the socket glial cell process joins the bundle (Supp. Fig. S1D).

To summarize, we used our imaging pipeline to show that amphid dendrites are well-ordered in young animals and that this order is maintained – albeit imperfectly – during larval growth, despite an approximately two-fold increase in the length and width of the bundle and despite ongoing mechanical perturbations caused by locomotion and pharyngeal pumping of the animal.

### **Structures at the dendrite endings are not required for dendrite order**

Our data show that amphid dendrites exhibit the most consistent order in the distal region of the dendrite bundle, closest to the nose. This region is especially interesting because it is rich in cell biological structures, including dendritic cilia used to detect signals from the environment and cell-cell junctions between each dendrite and the amphid sheath glial cell (Fig. 3A). By contrast, the remainder of the dendrites are comparatively featureless, lacking gap junctions, synapses, or any other obvious cell biological specializations. We therefore wanted to test whether cilia or interactions with the sheath glial cell contribute to amphid dendrite order.

We first looked at amphid cilia as a potential source of dendrite order. Early EM reconstructions showed that the order of amphid cilia is also stereotyped, albeit different from that of amphid dendrites (Ward et al., 1975). To test the hypothesis that amphid cilia are required for dendrite order, we crossed our markers into a mutant lacking the RFX transcription factor DAF-19, which is required to activate the genetic program for ciliogenesis (Fig. 3B) (Swoboda et al., 2000). Because *daf-19* mutants constitutively enter a non-reproductive

developmental state called dauer, we also introduced a mutation in *daf-12*, which encodes a receptor required for dauer entry (Antebi et al., 2000). *daf-19; daf-12* animals lack cilia but do not enter dauer, allowing the strain to be maintained as a homozygous stock (Senti and Swoboda, 2008). We found that lack of cilia had no effect on fasciculation or dendrite order (Fig. 3B, Supp. Fig. S2). To statistically quantify this observation, we performed permutation tests comparing *daf-19; daf-12* with simulated random distributions (Fig. 3B, blue column) or with our observed wild-type population (Fig. 3B, red column). Darker blues indicate that *daf-19* dendrite order is non-random, while the absence of darker reds indicates that *daf-19* dendrite order does not differ from wild type. These tests are consistent with the qualitative impression that dendrite order is unaffected. As cilia are required for normal neuronal activity, this result also implies that dendrite order does not depend on normal patterns of activity.

To further test the role of dendrite endings in establishing dendrite order, we examined mutants lacking the splicing factor MEC-8 (Lundquist et al., 1996). Whereas wild-type dendrite endings enter the amphid sheath glial cell in a stereotyped order and converge into a central channel, in *mec-8* mutants the amphid dendrite endings are disorganized and diverge into separate, isolated channels in the sheath glial cell (Fig. 3C) (Perkins et al., 1986). Despite this disorganization, we found that overall dendrite fasciculation and order along the length of the amphid bundle remain normal (Fig. 3C, Supp. Fig. S2). Altogether, our results show that proper arrangement of amphid cilia is not required for dendrite order.

We next tested whether interactions with the amphid glial cell are required for dendrite order. Amphid dendrites form cell junctions with the sheath glial cell, and the sheath glial cell secretes

factors that promote the normal development and function of the dendrite sensory endings (Bacaj et al., 2008). To test the possibility that the sheath glial cell might impose order on the dendrites, we genetically ablated sheath glia using diphtheria toxin expressed under the control of a late embryonic-stage amphid sheath promoter (Fig. 3D) (Bacaj et al., 2008). We were not able to ablate the sheath glia in earlier embryonic stages, as that causes amphid dendrites to fail to extend (Singhal and Shaham, 2017). Our strain also carried a fluorescent marker for the amphid sheath glial cell, allowing us to identify and exclude rare animals in which ablation failed. In glia-ablated animals, we found dendrite fasciculation and order to be unchanged from wild type, suggesting that sheath glia are not required to maintain dendrite order (Fig. 3D, Supp. Fig. S2). Together, our data suggest that the conspicuous cell biological features of amphid dendrites – their cilia and cell-cell junctions – are not required for dendrite fasciculation or order.

### **The cell adhesion molecules *cdh-4*, *sax-7*, and *ptp-3* are required for dendrite fasciculation**

Next, we considered the possibility that cell adhesion molecules (CAMs) along the lengths of the dendrites might be required for fasciculation and dendrite order. Previous studies in *C. elegans* and other organisms have shown that cell adhesion molecules such as SAX-7/L1CAM and the large extracellular matrix molecule DIG-1 are required for dendrite and axon fasciculation (Burket et al., 2006; Bénard et al., 2006; Sasakura et al., 2005). However, few studies in any system have explored how CAMs affect the ordering of axons or dendrites within a bundle (Lin et al., 1994; Schwabe et al., 2014). We wanted to identify CAMs that affect amphid dendrite fasciculation and order. Since it is technically unfeasible to conduct a large-scale forward genetic screen for dendrite order defects using our imaging pipeline, we decided to focus first on a small number of candidate CAMs.

To this end, we began by generating a list of 20 CAMs that are known to play roles in axon fasciculation, that have highly enriched expression in amphid neurons, or that interact with CAMs known to affect fasciculation in other areas of the *C. elegans* nervous system or in other organisms (Table 1). To further prioritize this list, we reasoned that disrupting CAMs that are important for amphid dendrite fasciculation might cause large-scale dendrite disorganization at some frequency, and that we would be able to detect even infrequent defects by using a dye-filling method to label the amphid neurons. Briefly, animals are soaked in 2 mg/ml of the lipophilic fluorescent dye DiI for 45 minutes, which for unknown reasons leads to bright and highly specific labeling of six amphid neurons, thus providing a fast and marker-independent method to visualize the overall structure of the amphid bundle. We used dye-filling to screen mutations in the 20 candidate CAMs using late larval stage (L4) animals. As a positive control, we found that *dig-1* mutants exhibited readily apparent defasciculation defects in this assay (24% of animals, Table 1).

Using this approach, we identified seven additional CAM mutants that cause defasciculation defects (*ptp-3*, *sax-7*, *vab-1*, *sax-3*, *cdh-4*, *unc-40* and *nrx-1*; Table 1). Interestingly, even the most pronounced defects among these are weakly penetrant (< 25%) suggesting that a redundant system of CAMs contributes to dendrite fasciculation. Loss of *sax-7* was previously observed to cause "loosening" of amphid dendrites in some animals, along with other defects, but this aspect of its phenotype has not been pursued (Sasakura et al., 2005). Because two mutants (*vab-1*, *sax-3*) exhibited gross head morphology defects and two mutants (*unc-40*, *nrx-1*) exhibited only very rare defasciculation defects (1 in 50 animals), we chose to focus our initial characterization on

the remaining three mutants – *cdh-4*, *ptp-3/LAR*, and *sax-7/L1CAM*.

### **Amphid dendrites are randomly ordered in *cdh-4* mutants**

From our candidate screen, we found *cdh-4* to be required for dendrite fasciculation. *cdh-4* encodes a Fat-like cadherin characterized by the large number of cadherin repeats in its extracellular domain (Fig. 4A). In *C. elegans*, *cdh-4* has been implicated in axon fasciculation in the dorsal and ventral nerve cords (Schmitz et al., 2007; Schmitz et al., 2008). We used the *rh310* allele, which introduces a premature stop codon in the extracellular domain (Fig. 4A)(Schmitz et al., 2008).

Since only a small number of *cdh-4* mutant animals had dendrite fasciculation defects (6%, Table 1), we wanted to ask whether dendrites are still ordered in *cdh-4* individuals that had normally fasciculated dendrite bundles. To do this, we crossed our markers into *cdh-4* animals. Consistent with our dye-filling results, we observed defasciculated amphid dendrites in only 1/21 animals examined (this individual is shown in Fig. 4B and its maximum bundle width is shown in pink in Fig. 4C). However, in the remaining 20/21 animals, we found that dendrite order was lost despite the bundle remaining intact and well-fasciculated (Fig. 4D), with the ASE, AFD, and AWA dendrites occupying the middle position with approximately equal frequency along the entire length of the bundle. Permutation tests confirmed that dendrite order in this population is not significantly different from random (light shading in blue color bar) and is significantly different from wild type (dark shading in red color bar). Our results show that, although *cdh-4* mutants exhibit only mild and weakly penetrant defects in fasciculation, they show nearly complete loss of dendrite order within the bundle, suggesting CDH-4 plays an essential role in

specifying dendrite order despite having a more redundant role in overall fasciculation.

### **Amphid dendrites in *ptp-3*/LAR and *sax-7*/L1CAM mutants exhibit altered order in young animals and random order in adults**

We next examined how *ptp-3* and *sax-7* contribute to amphid dendrite fasciculation and order. *ptp-3* encodes a receptor-like protein tyrosine phosphatase that is part of the leukocyte antigen related (LAR) family of proteins that play important roles in nervous system development, including axon guidance and fasciculation (Ackley et al., 2005; Clandinin et al., 2001; Dunah et al., 2005; Harrington et al., 2002; Krueger et al., 1996; Maurel-Zaffran et al., 2001; Wills et al., 1999). *sax-7* encodes a homolog of the L1 cell adhesion molecule that is also widely involved in neurodevelopment, including axon guidance and fasciculation, and is disrupted in a human neurological disorder called L1 syndrome (Bénard et al., 2012; Chen and Zhou, 2010; Kim and Emmons, 2017; Sakurai, 2012; Sasakura et al., 2005).

To examine dendrite defects, we crossed our markers to *ptp-3* and *sax-7* mutants. There are short and long isoforms of *ptp-3* (*ptp-3a* and *ptp-3b*; Fig. 5A), and we made use of *ptp-3(mu256)*, which disrupts both isoforms, as well as *ptp-3(ok244)*, which disrupts only the longer *ptp-3a* isoform (Fig. 5A). There are also short and long isoforms of *sax-7* (*sax-7S* and *sax-7L* respectively (Bénard et al., 2012; Pocock et al., 2008; Sasakura et al., 2005; Wang et al., 2005), Fig. 5B) and we made use of two alleles that disrupt both isoforms: *sax-7(ky146)* was used for most of our analyses, and we confirmed our results using *sax-7(eq1)* (Wang et al., 2005; Zallen et al., 1999).



As expected from our dye-filling assays, *ptp-3(mu256)* and *sax-7(ky146)* exhibit amphid defasciculation defects with low penetrance (pink traces in Fig. 5C, F and representative images in Supp. Fig. 3A, B). Fasciculation defects were not observed in *ptp-3(ok244)*, suggesting that the shorter PTP-3B isoform is sufficient for fasciculation (Supp. Fig. 3C). In both *ptp-3(mu256)* and *sax-7(ky146)*, fasciculation defects become progressively more severe throughout larval development (Fig. 5C, F), consistent with previous observations that SAX-7 is required for the maintenance of nervous system architecture (Bénard et al., 2012; Sasakura et al., 2005).

To assess dendrite order, we examined only dendrite bundles that remained tightly fasciculated. In older animals (72 h, adult stage), *ptp-3(mu256)* and *sax-7* exhibited random dendrite order, similar to what we observed in *cdh-4* (Fig. 5D, G). These defects are specific to the PTP-3B isoform and to SAX-7, as dendrite order is not affected by loss of PTP-3A alone (*ptp-3(ok244)*, Supp. Fig. 3C) or by disruption of adhesion molecules that interact genetically or physically with SAX-7 or its homologs in other contexts (DMA-1, CLR-1, IGCM-1) (Supp. Fig. 3E-G) (Dong et al., 2013; Islam et al., 2003; Liu et al., 2016; Salzberg et al., 2013). As a further specificity control, we examined a second allele of *sax-7*, *eq1*, and observed similar defects to *sax-7(ky146)* (Supp. Fig. 3D).

In contrast to adults, *ptp-3(mu256)* and *sax-7* young larvae (24 h, L2/L3 stage) exhibited a dendrite order that was neither random nor wild type (Fig. 5D, G). In *ptp-3(mu256)* animals at the 24 h (L2/L3) and 48 h (L4) time points, the bundle is arranged in a stereotyped order that resembles wild type but has the switch point shifted towards the nose, such that ASE (red) occupies the middle position throughout nearly the entire bundle (Fig. 5D). In *sax-7* animals at

the 24 h (L2/L3) time point, the middle position is occupied with roughly equal frequency by ASE (red) and AWC (yellow) but almost never by AFD (blue), indicating that dendrite order is not random. As animals reach the 48 h (L4) time point, the order of dendrites appears increasingly random, and by 72 h (adult) it is indistinguishable from the random order seen in *cdh-4* (Fig. 5G). Loss of PTP-3 and SAX-7 together (*ptp-3(mu256); sax-7(ky146)* double mutant) leads to enhanced defasciculation and increased randomness of dendrite order at the 48 h (L4) time point, consistent with these molecules acting partly redundantly (Supp. Fig. 3H, I).

Together, our results suggest that PTP-3 and SAX-7 are required, first, to establish the wild-type dendrite order during early development and, second, to maintain dendrite order throughout larval growth. The observation that loss of a single CAM can generate an order that is neither wild type nor random suggests that dendrites might normally "choose" from among several potential neighbors based on differential adhesion, and that these affinities are altered when a given CAM is removed.

Differential adhesion among dendrites might reflect CAMs being expressed at different levels in distinct neurons, as was recently shown for a single CAM that helps to order *Drosophila* retinal axons (Schwabe et al., 2014). Therefore, we examined the expression patterns of *ptp-3b* and *sax-7* by fusing promoter regions upstream of their coding regions (7kb, *ptp-3b*; 3kb, *sax-7S*) to a nuclear-localized mCherry (Fig. 5E, H). We imaged early larval stage (L1) animals and used the six dye-filling neurons, stained in green, as landmarks to assist in cell identification. We found that *ptp-3b* is expressed at low but detectable levels in many cells, including amphid neurons, with highest expression in AWB and ASE (Fig. 5E). We found that

*sax-7* is expressed throughout the nervous system and, within the amphid, is consistently expressed in AWC, ASE, and ASK (Fig. 5H). The differential expression we observe is consistent with a differential adhesion model involving these and other CAMs.

To summarize, we found that loss of either *sax-7* or *ptp-3* causes amphid dendrites to initially take on a non-random arrangement that is distinct from wild type. In both *sax-7* and *ptp-3* mutants, this order becomes increasingly random over time, and correlates with increased defasciculation. We also found that *sax-7* and *ptp-3* were expressed in a subset of amphid neurons, suggesting that these adhesion molecules are not uniformly expressed. Taken together, our data suggest that *sax-7* and *ptp-3* are required for ordering dendrites within the amphid bundle, such that loss of either CAM causes a weakly-penetrant defasciculation phenotype and a highly-penetrant change in dendrite order.

### **Misexpression of SAX-7 alters amphid dendrite order**

These results suggest a concept model in which differential expression of CAMs results in a reproducible pattern of adhesion among dendrites (Fig. 6A). We hypothesized that if this model is correct, then experimentally misexpressing any single CAM might also alter dendrite order, leading to more variable order, or to a different but stereotyped order (Fig. 6A). Conversely, for a model in which CAMs act permissively – as "glue" to hold the bundle together – then misexpression of a CAM would not be expected to affect dendrite order. To test our hypothesis, we misexpressed SAX-7 in all amphid neurons using a pan-amphid neuron promoter (*osm-6pro*) in wild-type animals. We used SAX-7 because, in our hands, PTP-3 appears to undergo post-transcriptional regulation that makes it difficult to manipulate. Misexpression of SAX-7 did not

change the dendrite order drastically, but led to a subtle yet reproducible changes in the wild-type order, shifting the switch point more posteriorly (Fig. 6D). These results suggest that SAX-7 may play an instructive role in specifying the arrangement of amphid dendrites, possibly by contributing to patterns of differential adhesion.

## **DISCUSSION**

### **Principles of nerve bundle organization**

In this study, we took advantage of the simple nervous system of *C. elegans* to quantitatively assess the arrangement of individual dendrites within a nerve bundle. We found that amphid dendrites are ordered within the bundle, and this order is maintained over time. Dendrite order does not seem to depend on the conspicuous cell biological structures at the dendrite endings (sensory cilia and dendrite-glia junctions) but is instead imposed by multiple CAMs expressed by the neurons. Loss of the Fat-like cadherin CDH-4 leads to randomized arrangement of dendrites, whereas loss of PTP-3/LAR or SAX-7/L1CAM, or misexpression of SAX-7, can cause dendrites to take on an altered non-random order. Taken together, our results suggest that the arrangement of dendrites within the bundle is determined by differential adhesion conferred by multiple CAMs, and altering their relative adhesivity can lead to novel arrangements.

Our results provide insight into the organization of nerve bundles, a defining feature of the nervous system that has previously received relatively little attention due to the technical challenges of studying it. Bundles are known to sometimes correspond to functional groupings of axons, for example each of the cranial nerves is composed of axons with shared functions such as smell, vision, or oculomotor control. Similarly, in the periphery, "fast" and "slow" motor axons are segregated into distinct bundles during development (Milner et al., 1998). In the mammalian cortex, dendrites arising from neurons in different cortical layers come together to form microcolumns (Fleischhauer et al., 1972; Fleischhauer, 1974; Peters and Walsh, 1972). Axons projecting from the retina, as well as the olfactory bulb, have provided evidence that

neurites can exhibit stereotyped arrangements within their respective bundles, for example reflecting their topographic or dorsal-ventral origins, or the chronological order of their outgrowth (Chan and Chung, 1999; Walsh and Guillery, 1984). However, the question of how nerve bundles are organized has been difficult to study due to two major technical problems. First, fasciculation defects often lead to axon guidance defects, and vice versa, making it challenging to distinguish one from the other except in rare cases (Luxey et al., 2013). Our approach circumvents this problem by taking advantage of the fact that amphid dendrites grow collectively via retrograde extension (Heiman and Shaham, 2009). Second, most studies have only been able to assess large populations of axons, making it impossible to ask how single neurons or neuron classes are arranged within a bundle. We and others have overcome the latter limitation by turning to invertebrate model organisms with simpler and more stereotyped anatomy that allows the trajectories of defined neurons to be examined.

Two previous sets of studies using invertebrate models are especially helpful to compare with our results. In classical studies using grasshoppers, Goodman and colleagues showed that a certain growing (G) axon selectively adheres to a defined partner (P) axon in a specific bundle. If the P axon is ablated, the G axon does not adhere to other axons in this bundle or in any neighboring bundles, suggesting a remarkable degree of selective adhesion between G and P (Bastiani et al., 1984; Lin et al., 1994; Raper et al., 1984). In a more recent study, Schwabe *et al.* studied the cartridges of the *Drosophila* visual system, which exhibit an invariant organization in which neurites from lamina cells (L) are surrounded by photoreceptor (R) axons. They found that this organization reflects differential expression levels of N-cadherin, with the higher-expressing L neurites forming an adhesive core surrounded by the lower-expressing R axons

(Schwabe et al., 2014).

These studies led to two major principles, which are further supported by the work described here: first, that neurites can exhibit stereotyped neighbor relationships within a bundle and, second, that these relationships can arise from differential adhesion. Importantly, our study introduces a third principle – that multiple adhesion molecules can act in concert to specify distinct relationships among many neurites, in a pattern that is more complex than the 1:1 pairing of G and P axons or the inside:outside relationship of L and R neurites.

### **Functional consequences of ordered bundles**

Why might nerve bundles be ordered? One trivial explanation would be that bundle order reflects the developmental order of neurite outgrowth, with the oldest neurite – typically the pioneer axon or dendrite – in the center, and the youngest neurites on the periphery. However, this is not the case in *C. elegans*, the only organism in which the birth order and neurite position of every neuron is known. As an example, the VD motor neurons are born post-embryonically and extend axons along the ventral nerve cord after the nerve cord is established, yet their axons insinuate deeply into the ventral nerve cord to adhere closely to the DD motor neurons, a functionally similar set of motoneurons that are born much earlier and lie at the center of the ventral nerve cord (White et al., 1976; White et al., 1986). This and similar examples suggest that neurites "choose" their neighbors within a bundle, possibly with functional consequences.

One intriguing hypothesis is that one's immediate neighbors within a bundle influence neuronal activity. For example, the dendrites of gonadotropin-releasing hormone neurons are

intertwined in bundles, and this arrangement has been proposed to help synchronize hormone release (Campbell et al., 2009). In a possibly related example, neuropeptide-releasing neurons in *Drosophila* that serve as circadian pacemakers undergo daily changes in axon fasciculation, driven by cycling expression levels of the NCAM adhesion molecule FAS2 (Fernández et al., 2008; Sivachenko et al., 2013). Interestingly, genetically manipulating FAS2 expression to force constitutive defasciculation leads to changes in circadian behavior, suggesting that fasciculation may indeed affect neuronal activity (Sivachenko et al., 2013).

There are at least three ways in which neighboring neurites could influence each other's activity. First, the presence of chemical synapses or electrical synapses (gap junctions) would couple the activity of immediate neighbors. Notably, no such synapses are present along the amphid dendrites. Second, neuropeptides or other small secreted molecules could locally signal to one's immediate neighbors. Finally, neighboring axons or dendrites could affect each other through passive electrical properties, a concept referred to as ephaptic coupling (Anastassiou et al., 2011; Arvanitaki, 1942). This idea is exciting because it is highly generalizable – anywhere neurites are apposed to one another, such ephaptic effects could be manifested. Consistent with this notion, Ferenczi *et al.* used an engineering approach to optogenetically manipulate ion flow in hippocampal and cortical axons and observed a "bystander" effect on the membrane current of neighboring axons, independent of synaptic transmission (Ferenczi et al., 2016). Remarkably, in wild-type *Drosophila*, Carlson and colleagues demonstrated similar ephaptic effects between bundled olfactory dendrites (Su et al., 2012): a short pulse of odor-induced activity in one of these dendrites inhibited tonic firing of its bundled neighbor, independently of chemical or electrical synapses. Importantly, they showed that this ephaptic effect could even alter



behavioral responses.

In light of these observations of ephaptic coupling, our finding that dendrites assume stereotyped neighbor relationships could have important implications for how sensory information is processed. Recently developed methods for whole-brain calcium imaging in *C. elegans* make it an ideal system for asking whether the neighbor relationships we describe here are mirrored by patterns of correlated neuronal activity and, if so, whether such correlations are disrupted by the mutants we found to alter dendrite order (Nguyen et al., 2016; Prevedel et al., 2014; Schrödel et al., 2013).

### **How simple rules generate complex patterns**

As Warren Lewis, a pioneer in cell biology, put it in 1922: “Were the various types of cells to lose their stickiness for one another and for the supporting extracellular white fibers, reticuli, etc., our bodies would at once disintegrate and flow off into the ground in a mixed stream of ectodermal, muscle, mesenchyme, endothelial, liver, pancreatic, and many other types of cells” (Lewis, 1922). Yet, it is not enough just to stick. Cells care about their neighbors, and arrange themselves into elaborate patterns as they assemble complex organs like the brain. Our work points to one way by which ordered structures may emerge in biological systems, namely, that cells may have differential adhesion for each other. In this model, the arrangement of cells in a tissue is optimized for adhesive strength between them – cells thermodynamically “fold” into their final arrangement in a manner comparable to protein folding. Importantly, if a single adhesion molecule is absent or misexpressed, the system reorders itself to maximize adhesion, thus producing a new stable order.

Evolutionarily, this “optimize adhesion” rule provides a general strategy to create a diverse set of well-ordered structures using only small changes in adhesion molecule expression. Interestingly, amphid sensilla in other nematode species such as *Acrobeles complexus*, *Strongyloides stercoralis*, and *Haemonchus contortus* also exhibit well-ordered bundles, albeit with configurations that are different from each other and from *C. elegans* (Bumbarger et al., 2009). It is interesting to speculate whether this diversity of structures may have arisen partly through altered expression of a small number of CAMs.

## EXPERIMENTAL PROCEDURES

### Strains and maintenance

Strains were constructed in the N2 background and cultured under standard conditions (Brenner, 1974; Stiernagle, 2006). In addition to the wild-type strain N2, the transgenes, and strains used in this study are described in Supplementary Tables S1–S3. Unless otherwise specified, all animals were imaged in the L4 stage, corresponding with ~48h after bleach synchronization (see "Time point analyses" below).

### *cdh-4* strain construction

To examine dendrite order in *cdh-4* mutant animals, we crossed *cdh-4(rh310)* animals into a strain expressing a three-neuron marker (CHB2646). Because *cdh-4* is located on the same chromosome as one of our integrated fluorescent markers (*hmnIs23*, AWA:YFP), we created a strain (CHB2770) carrying AWA:YFP on an extrachromosomal array (*hmnEx1486*) and crossed that array into a strain containing *hmnIs17* (AFD:CFP, ASE:mCherry) for all *cdh-4* analyses. For the permutation test comparing *cdh-4* to wild-type dendrite order, we used CHB2646 instead of CHB1963 as the wild-type control.

### Time point analyses

Animals were bleach-synchronized (20% bleach, 250 mM NaOH in dH<sub>2</sub>O for 5 min, then hatched overnight in M9 medium), plated onto agar plates containing food, and cultured under standard conditions. We imaged animals at three different time points: second larval stage (L2-stage; 24 hours after plating), fourth larval stage (L4-stage; 48 hours after plating), and 1-day adult (72 hours after plating).

## Microscopy

Image stacks were collected on a DeltaVision Core imaging system (Applied Precision) either with a UApo 40×/1.35 NA oil-immersion objective or a PlanApo 60×/1.42 NA oil-immersion objective and a Photometrics CoolSnap HQ2 camera (Roper Scientific). Animals were mounted on an agarose pad with 20-40mM sodium azide and imaged in yellow (excitation [EX] 513 nm/emission [EM] 559 nm), red (EX 575 nm/EM 632 nm), blue (EX 438 nm/EM 470 nm), and/or green (EX 475 nm/EM 525 nm) channels.

Deconvolution and analysis of images were performed with Softworx (Applied Precision) and ImageJ (NIH, Bethesda, MD). Maximum-intensity projections were obtained using contiguous optical sections.

## Notes on image processing

Projections were adjusted for brightness, contrast, and were pseudo-colored in Photoshop (Adobe). Merged color images were assembled using the Screen layer mode in Photoshop. Figures were assembled using Photoshop CS5.1 and Illustrator CS5.1.

## Image analysis

Image analysis for each animal was done in three parts. First, we imaged three amphid neurons using our three-neuron marker (ASE:mCherry, AWA:YFP, AFD:CFP). We then input this image stack into a custom-made Matlab script that detected the 3D coordinates of each dendrite and generated files containing the distances between each pair of dendrites (AWA-ASE,

AWA-AFD, and AFD-ASE) at every point along the dendrite bundle (see Section I: generating 3D coordinates and pairwise distances). Second, we manually inspected and corrected the computer-generated dendrite traces (see Section II: manual inspection and selection of dendrite traces). Finally, we pooled animals belonging to the same population and wrote scripts in Python to generate figures to visualize the data as well as conduct statistical tests to compare populations (see Section III: data visualization, resampling methods, and statistical analysis). Scripts for all the analysis in this paper are available for download at <https://github.com/zcandiceyip>.

### Section I: Generating 3D coordinates and pairwise distances

The first step in our image-processing pipeline was to obtain 3D coordinates for the ASE, AWA, and AFD dendrites in each animal. To do this, we wrote a script in Matlab that takes an image stack containing three amphid dendrites imaged in three different channels as input and returns several files. One file contains pairwise distances between the three dendrites along the length of the dendrite bundle starting at the dendrite tip. Another set of files contains the digitized dendrite traces superimposed on maximum-intensity projections for manual inspection of the trace accuracy. First, we will describe how the pairwise distances between dendrites are generated.

As mentioned above, our script takes as input an image stack containing three amphid neurons imaged in three different channels. For each amphid neuron, we manually selected the start and end points of the dendrite by clicking on 2D projections of that image generated in Matlab. We consistently chose the starting point to be the ciliated ending at the tip of the

dendrite and the ending point to be the cell body. Next, for each dendrite, Dijkstra's algorithm was used to find the brightest path between the start and end points. Dijkstra's algorithm finds the shortest path between two nodes, where the objective function is to minimize the distance between the two nodes. In this case, the two nodes are the user-defined start and end points, and distance is defined by the inverse of the intensity of each pixel between the start and end points. Thus, the brightest pixels between the start and end points represent the shortest path. Since the brightest pixels in our image stack between the start and end points correspond to the dendrite itself, Dijkstra's algorithm yields the 3D coordinates of the dendrite, thus generating a computerized trace of that dendrite.

After applying Dijkstra's algorithm to obtain digital traces of the three amphid dendrites, the next step is to generate a centroid line that runs in the middle of the three dendrites. To do this, we first cropped the start and end points of the three dendrites so that the three dendrite traces were of similar lengths. We did this by averaging the coordinates of the three dendrite tips on each end, selecting the dendrite that gave the shortest distance between the average dendrite tip and the opposite end of that dendrite, and finding dendrite points on the other two dendrites that were closest to the starting point of the shortest dendrite. Those two dendrite points became the new starting points for the two longer dendrites. This process was repeated for the other side of the dendrite bundle. Next, we generated new start and end points of the dendrite bundle by averaging the coordinates of the three cropped dendrites on each end, and found a centroid line by averaging the coordinates of all the points along the three dendrite traces. Finally, we used that centroid line to determine a series of planes that intersect each of the three dendrite traces once by walking along the average trace pixel by pixel, and used Dijkstra's algorithm to find the

shortest path between the centroid line to each of the three traces.

These planes, or cross-sections, yield triangles where each vertex of the triangle is a point along one of the three dendrite traces and the sides of the triangle give the pairwise distances between amphid dendrites in a single cross-section. We then calculated each of these pairwise distances by finding the Euclidean distance between two vertices, and saved them in a comma-delimited (".csv") spreadsheet. In addition, we obtained 2D projections of the computerized traces of each dendrite and superimposed them onto maximum-intensity projections of each image stack to manually confirm that the dendrite trace followed the actual dendrite in the image.

## Section II: Manual inspection and selection of dendrite traces

To confirm that the computer-generated dendrite traces and resulting pairwise distances for each animal were accurate, we manually inspected maximum-intensity projections of each image stack projected in XY- and YZ-planes and superimposed the computer-generated dendrite trace onto the projections. If the computer-generated dendrite trace did not follow the dendrite in the maximum-intensity projections, we excluded that animal in further analyses.

In general, the computer-generated dendrite traces followed the dendrites with high fidelity. However, the start and end points of the computer-generated traces were usually inaccurate, as the chosen start and end points were selected a few microns outside the actual start and end points of the dendrite. To correct these inaccuracies and standardize the start and end points, we used the XY-projections to count the number of pixels that were traced inaccurately at the proximal and distal dendrite ends, and deleted that number of rows in the corresponding ".csv"

spreadsheet. This technique ensured that we were looking at dendrite tracings that, across all animals, begin at the dendrite tip (excluding the cilium) and end near the nerve ring.

To correct for variations in animal size within a population, we measured the length of an anatomical feature of the head of each animal (distance from the distal pharyngeal bulb to the nose tip) and used that distance to normalize the lengths of the dendrite traces. Because we are making point-by-point comparisons along the dendrite bundle across animals, we further segmented each dendrite bundle into 100 equally-sized bins and took the mean pairwise distance within each bin for further analysis. For example, if an animal had pairwise distance measurements for 200 positions along the dendrite bundle, then we would segment the bundle into 100 bins, with each bin containing pairwise distance measurements from two adjacent positions, and we would assign the mean of those two pairwise distance measurements to that bin.

### Section III: Data visualization, resampling methods, and statistical analysis

**Maximum pairwise distance plots:** For each animal, we plotted the maximum pairwise distance at each point along the dendrite bundle. We defined dendrite bundles to be defasciculated (in pink) if the maximum pairwise distances for an animal were substantially larger than the mean maximum pairwise distance, and confirmed the defasciculation by visually inspecting maximum-intensity projections of the dendrite bundle. Animals with defasciculated dendrite bundles were excluded from dendrite order analysis.

**Population plots and summary plots:** Each column in the population plot represents the middle dendrite (ASE in red, AWA in yellow, AFD in blue) at each of the 100 bins of the bundle



of a single animal. To create summary plots, we calculated and plotted three fractions – the counts of ASE, AFD, and AWA as a fraction of the total for each bin along the dendrite bundle. For populations with ordered dendrite bundles, one of those three fractions should be close to 1 while the other two fractions should be close to 0, whereas populations with highly disordered bundles have all three fractions closer to 0.33.

**Statistical analyses:** We used two approaches to test whether the dendrite order for a population is significantly different from random. First, we used a chi-squared test to test for the independence of two populations (genotype vs. random). We chose the chi-squared test because our data is categorical (at each position, the middle dendrite is either AWA, ASE, or AFD) and, for our typical sample sizes (~20), counts of >5 are expected in each category for a random distribution. We calculated the chi-squared values (chi-squared test statistic:

$\sum \frac{(\text{observed} - \text{expected})^2}{\text{expected}}$ ) and associated *p*-values at each point along the dendrite bundle,

where the observed values are the middle dendrite counts of ASE, AWA, and AFD for a given genotype and the expected values are  $n/3$ , where  $n$  is the number of dendrite bundles analyzed for the given genotype. For example, if  $n=21$  then we would expect a random distribution to yield 7 counts each of ASE in the middle, AWA in the middle, and AFD in the middle, and these would be compared to our observed values using the formula above.

When comparing a mutant genotype to wild type, we could not use the chi-squared test because the expected value at some positions would be <5 (for example, at the nose tip in 48h L4 animals, both ASE and AWA values are zero, leading to a division by zero error when attempting to use the chi-squared formula; the chi-squared test is also not suitable for

comparisons where expected values are  $<5$  in any category). Therefore, we adopted a second approach based on a permutation test using Fisher's exact test ( $3 \times 2$ ) as the test statistic. In this case, the null hypothesis is that the two populations (for example, mutant genotype vs. wild type) are drawn from the same distribution and differ only by sampling error. We first calculated a nominal  $p$ -value at each position along the bundle by comparing the counts of AWA, ASE, and AFD of each population using Fisher's exact test. Then, for 500 iterations, we merged the two populations of middle dendrite values, randomly split the mixed populations into two equally-sized groups, and calculated  $p$ -values comparing these resampled mock populations to each other using Fisher's exact test. This approach yields 501  $p$ -values (1 true  $p$ -value + 500  $p$ -values from resampling) for each point along the length of the dendrite bundle. Finally, we determined the percentile rank of the true  $p$ -value and plotted that rank using a red log-scale color bar. Darker reds on the color bar indicate that the true  $p$ -value is much lower than would be expected if the samples were drawn from the same population; that is, the populations are more different than one would expect from sampling error alone.

We also used this approach to compare each genotype to a random population (Fig. 2-6, Supp. Fig. S1, S3, blue bars). In all figures, rather than presenting a mixture of chi-squared and permutation tests, permutation test results are shown for comparison to random (Fig. 2-6, Supp. Fig. S1, S3, blue bars) and comparison to wild type (Fig. 3-6, Supp. Fig. S3, red bars). A comparison of chi-squared and permutation tests is shown in Supp. Fig. S1A (green vs. blue bars respectively).

### Switch point swarmplot

To create this swarmplot (Supp. Fig. S1E), we measured three different lengths in wild-type L4 animals. First, we measured the distance from the switch point to the nose tip. To do this, we defined the switch point to be the point where the middle dendrite changes from one dendrite to another for more than one bin (for definition of a bin, see Section II under “Image analysis” methods section). Second, we measured the distance from the nose tip to the dendrite tip of AUA. Finally, we measured the length of the amphid socket that is fasciculated with the amphid; we used the amphid dendrite AFD (blue) as a proxy for the amphid bundle. We created the figure using the swarmplot function in the Python Seaborn package. To determine the difference between populations, we used a two-sample Kolmogorov-Smirnov test because the measurements for the switch point were not normally distributed.

### Candidate screen of cell adhesion molecules

For each mutant, we used DiO (Sigma, D4292) to dye-fill six amphid neurons and scored 50 L4 animals for amphid defasciculation phenotypes using a fluorescence dissecting microscope (Altun et al., 2002).

### Expression pattern analysis

To determine the identity of the amphid neurons that express *sax-7* or *ptp-3* we used DiI (Sigma, 468495) to dye-fill L1 animals expressing a nuclear-localized mCherry (NLS-mCherry-NLS) under the control of *sax-7* or *ptp-3* promoters (CHB1687 and CHB1840 respectively, see Supp. Table S1). We then collected image stacks for these animals in the red and green channels as L1-stage animals as well as positions of all nuclei, visualized using Nomarski optics. Because

the identity and positions of the dye-filled amphid neuron cell bodies are known for L1 animals (Sulston et al., 1983), we used the position of the dye-filled amphid cell bodies to infer the identity of the other amphid neurons based on their relative nuclei positioning.

## **REFERENCES**

Ackley, B. D., Harrington, R. J., Hudson, M. L., Williams, L., Kenyon, C. J., Chisholm, A. D., and Jin, Y. (2005). The two isoforms of the *Caenorhabditis elegans* leukocyte-common antigen related receptor tyrosine phosphatase PTP-3 function independently in axon guidance and synapse formation. *J Neurosci* 25, 7517-7528.

Altun, Z. F., Herndon, L. A., Wolkow, C. A., Crocker, C., Lints, R., and Hall, D. H. (2002). WormAtlas

Altun, Z. F., and Hall, D. H. (2005). SW-Worm Viewer, Slice No. 18 and 50.  
[www.WormAtlas.org](http://www.WormAtlas.org)

Anastassiou, C. A., Perin, R., Markram, H., and Koch, C. (2011). Ephaptic coupling of cortical neurons. *Nat Neurosci* 14, 217-223.

Antebi, A., Yeh, W. H., Tait, D., Hedgecock, E. M., and Riddle, D. L. (2000). *daf-12* encodes a nuclear receptor that regulates the dauer diapause and developmental age in *C. elegans*. *Genes Dev* 14, 1512-1527.

Arvanitaki, A. (1942). Effects evoked in an axon by the activity of a contiguous one. *J Neurophysiology* 5, 89-108.

Bacaj, T., Tevlin, M., Lu, Y., and Shaham, S. (2008). Glia are essential for sensory organ function in *C. elegans*. *Science* 322, 744-747.

Bastiani, M. J., Raper, J. A., and Goodman, C. S. (1984). Pathfinding by neuronal growth cones in grasshopper embryos. III. Selective affinity of the G growth cone for the P cells within the A/P fascicle. *J Neurosci* 4, 2311-2328.

Bénard, C. Y., Blanchette, C., Recio, J., and Hobert, O. (2012). The secreted immunoglobulin domain proteins ZIG-5 and ZIG-8 cooperate with L1CAM/SAX-7 to maintain nervous system integrity. *PLoS Genet* 8, e1002819.

Bénard, C. Y., Boyanov, A., Hall, D. H., and Hobert, O. (2006). DIG-1, a novel giant protein, non-autonomously mediates maintenance of nervous system architecture. *Development* 133, 3329-3340.

Brenner, S. (1974). The genetics of *Caenorhabditis elegans*. *Genetics* 77, 71-94.

Bumbarger, D. J., Wijeratne, S., Carter, C., Crum, J., Ellisman, M. H., and Baldwin, J. G. (2009). Three-dimensional reconstruction of the amphid sensilla in the microbial feeding nematode, *Acroboles complexus* (Nematoda: Rhabditida). *J Comp Neurol* 512, 271-281.

Burket, C. T., Higgins, C. E., Hull, L. C., Berninsone, P. M., and Ryder, E. F. (2006). The *C. elegans* gene *dig-1* encodes a giant member of the immunoglobulin superfamily that promotes fasciculation of neuronal processes. *Dev Biol* 299, 193-205.

Consortium, C. E. D. M. (2012). large-scale screening for targeted knockouts in the *Caenorhabditis elegans* genome. *G3 (Bethesda)* 2, 1415-1425.

Campbell, R. E., Gaidamaka, G., Han, S. K., and Herbison, A. E. (2009). Dendro-dendritic bundling and shared synapses between gonadotropin-releasing hormone neurons. *Proc Natl Acad Sci U S A* 106, 10835-10840.

Ch'ng, Q., Williams, L., Lie, Y. S., Sym, M., Whangbo, J., and Kenyon, C. (2003). Identification of genes that regulate a left-right asymmetric neuronal migration in *Caenorhabditis elegans*. *Genetics* 164, 1355-1367.

Chan, S. O., and Chung, K. Y. (1999). Changes in axon arrangement in the retinofugal [correction of retinofungal] pathway of mouse embryos: confocal microscopy study using single- and double-dye label. *J Comp Neurol* 406, 251-262.

Chen, L., and Zhou, S. (2010). CRASH'ing with the worm: insights into L1CAM functions and mechanisms. *Dev Dyn* 239, 1490-1501.

Clandinin, T. R., Lee, C. H., Herman, T., Lee, R. C., Yang, A. Y., Ovasapyan, S., and Zipursky, S. L. (2001). *Drosophila* LAR regulates R1-R6 and R7 target specificity in the visual system. *Neuron* 32, 237-248.

Colosimo, M. E., Brown, A., Mukhopadhyay, S., Gabel, C., Lanjuin, A. E., Samuel, A. D., and Sengupta, P. (2004). Identification of thermosensory and olfactory neuron-specific genes via expression profiling of single neuron types. *Curr Biol* 14, 2245-2251.

Dong, X., Liu, O. W., Howell, A. S., and Shen, K. (2013). An extracellular adhesion molecule complex patterns dendritic branching and morphogenesis. *Cell* 155, 296-307.

Doroquez, D. B., Berciu, C., Anderson, J. R., Sengupta, P., and Nicastro, D. (2014). A high-resolution morphological and ultrastructural map of anterior sensory cilia and glia in *Caenorhabditis elegans*. *Elife* 3, e01948.

Dunah, A. W., Hueske, E., Wyszynski, M., Hoogenraad, C. C., Jaworski, J., Pak, D. T., Simonetta, A., Liu, G., and Sheng, M. (2005). LAR receptor protein tyrosine phosphatases in the development and maintenance of excitatory synapses. *Nat Neurosci* 8, 458-467.

Ferenczi, E. A. et al. (2016). Optogenetic approaches addressing extracellular modulation of neural excitability. *Sci Rep* 6, 23947.

Fernández, M. P., Berni, J., and Ceriani, M. F. (2008). Circadian remodeling of neuronal circuits involved in rhythmic behavior. *PLoS Biol* 6, e69.

Fleischhauer, K. (1974). On different patterns of dendritic bundling in the cerebral cortex of the cat. *Kidney Int* 5, 115-126.

Fleischhauer, K., Petsche, H., and Wittkowski, W. (1972). Vertical bundles of dendrites in the neocortex. *Z Anat Entwicklungsgesch* 136, 213-223.

George, S. E., Simokat, K., Hardin, J., and Chisholm, A. D. (1998). The VAB-1 Eph receptor tyrosine kinase functions in neural and epithelial morphogenesis in *C. elegans*. *Cell* 92, 633-643.

Haklai-Topper, L., Soutschek, J., Sabanay, H., Scheel, J., Hobert, O., and Peles, E. (2011). The neurexin superfamily of *Caenorhabditis elegans*. *Gene Expr Patterns* 11, 144-150.

Harrington, R. J., Gutch, M. J., Hengartner, M. O., Tonks, N. K., and Chisholm, A. D. (2002). The *C. elegans* LAR-like receptor tyrosine phosphatase PTP-3 and the VAB-1 Eph receptor tyrosine kinase have partly redundant functions in morphogenesis. *Development* 129, 2141-2153.

Hedgecock, E. M., Culotti, J. G., and Hall, D. H. (1990). The *unc-5*, *unc-6*, and *unc-40* genes guide circumferential migrations of pioneer axons and mesodermal cells on the epidermis in *C. elegans*. *Neuron* 4, 61-85.

Heiman, M. G., and Shaham, S. (2009). DEX-1 and DYF-7 establish sensory dendrite length by anchoring dendritic tips during cell migration. *Cell* 137, 344-355.

Herculano-Houzel, S. (2009). The human brain in numbers: a linearly scaled-up primate brain. *Front Hum Neurosci* 3, 31.

Ikegami, R., Zheng, H., Ong, S. H., and Culotti, J. (2004). Integration of semaphorin-2A/MAB-20, ephrin-4, and UNC-129 TGF-beta signaling pathways regulates sorting of distinct sensory rays in *C. elegans*. *Dev Cell* 6, 383-395.

Islam, R., Wei, S. Y., Chiu, W. H., Hortsch, M., and Hsu, J. C. (2003). Neuroglial activates Echinoid to antagonize the *Drosophila* EGF receptor signaling pathway. *Development* 130, 2051-2059.

Johnson, R. P., Kang, S. H., and Kramer, J. M. (2006). *C. elegans* dystroglycan DGN-1 functions in epithelia and neurons, but not muscle, and independently of dystrophin. *Development* 133, 1911-1921.

Johnson, R. P., and Kramer, J. M. (2012). Neural maintenance roles for the matrix receptor dystroglycan and the nuclear anchorage complex in *Caenorhabditis elegans*. *Genetics* 190, 1365-1377.

Kim, B., and Emmons, S. W. (2017). Multiple conserved cell adhesion protein interactions mediate neural wiring of a sensory circuit in *C. elegans*. *Elife* 6,

Kondo, S., and Asai, R. (1995). A reaction-diffusion wave on the skin of the marine angelfish *Pomacanthus*. *Nature* *376*, 765-768.

Krueger, N. X., Van Vactor, D., Wan, H. I., Gelbart, W. M., Goodman, C. S., and Saito, H. (1996). The transmembrane tyrosine phosphatase DLAR controls motor axon guidance in *Drosophila*. *Cell* *84*, 611-622.

Lewis, W. H. (1922). The adhesive quality of cells. *The Anatomical Record* *23*, 387-392.

Lin, D. M., Fetter, R. D., Kopczynski, C., Grenningloh, G., and Goodman, C. S. (1994). Genetic analysis of Fasciclin II in *Drosophila*: defasciculation, refasciculation, and altered fasciculation. *Neuron* *13*, 1055-1069.

Liu, O. W., and Shen, K. (2011). The transmembrane LRR protein DMA-1 promotes dendrite branching and growth in *C. elegans*. *Nat Neurosci* *15*, 57-63.

Liu, X., Wang, X., and Shen, K. (2016). Receptor tyrosine phosphatase CLR-1 acts in skin cells to promote sensory dendrite outgrowth. *Dev Biol* *413*, 60-69.

Lundquist, E. A., Herman, R. K., Rogalski, T. M., Mullen, G. P., Moerman, D. G., and Shaw, J. E. (1996). The *mec-8* gene of *C. elegans* encodes a protein with two RNA recognition motifs and regulates alternative splicing of *unc-52* transcripts. *Development* *122*, 1601-1610.

Luxey, M., Jungas, T., Laussu, J., Audouard, C., Garces, A., and Davy, A. (2013). Eph:ephrin-B1 forward signaling controls fasciculation of sensory and motor axons. *Dev Biol* *383*, 264-274.

Maduro, M., and Pilgrim, D. (1995). Identification and cloning of *unc-119*, a gene expressed in the *Caenorhabditis elegans* nervous system. *Genetics* *141*, 977-988.

Manukyan, L., Montandon, S. A., Fofonjka, A., Smirnov, S., and Milinkovitch, M. C. (2017). A living mesoscopic cellular automaton made of skin scales. *Nature* *544*, 173-179.

Maro, G. S., Gao, S., Olechwier, A. M., Hung, W. L., Liu, M., Özkan, E., Zhen, M., and Shen, K. (2015). MADD-4/Punctin and Neurexin Organize *C. elegans* GABAergic Postsynapses through Neuroligin. *Neuron* *86*, 1420-1432.

Maurel-Zaffran, C., Suzuki, T., Gahmon, G., Treisman, J. E., and Dickson, B. J. (2001). Cell-autonomous and -nonautonomous functions of LAR in R7 photoreceptor axon targeting. *Neuron* *32*, 225-235.

Meinhardt, H. (1995). *The Algorithmic Beauty of Sea Shells*.

Mello, C. C., Kramer, J. M., Stinchcomb, D., and Ambros, V. (1991). Efficient gene transfer in *C. elegans*: extrachromosomal maintenance and integration of transforming sequences. *EMBO J* *10*, 3959-3970.



Milner, L. D., Rafuse, V. F., and Landmesser, L. T. (1998). Selective fasciculation and divergent pathfinding decisions of embryonic chick motor axons projecting to fast and slow muscle regions. *J Neurosci* *18*, 3297-3313.

Mohamed, A. M., and Chin-Sang, I. D. (2006). Characterization of loss-of-function and gain-of-function Eph receptor tyrosine kinase signaling in *C. elegans* axon targeting and cell migration. *Dev Biol* *290*, 164-176.

Najarro, E. H., Wong, L., Zhen, M., Carpio, E. P., Goncharov, A., Garriga, G., Lundquist, E. A., Jin, Y., and Ackley, B. D. (2012). *Caenorhabditis elegans* flamingo cadherin *fmi-1* regulates GABAergic neuronal development. *J Neurosci* *32*, 4196-4211.

Nakao, F. et al. (2007). The PLEXIN PLX-2 and the ephrin EFN-4 have distinct roles in MAB-20/Semaphorin 2A signaling in *Caenorhabditis elegans* morphogenesis. *Genetics* *176*, 1591-1607.

Nguyen, J. P., Shipley, F. B., Linder, A. N., Plummer, G. S., Liu, M., Setru, S. U., Shaevitz, J. W., and Leifer, A. M. (2016). Whole-brain calcium imaging with cellular resolution in freely behaving *Caenorhabditis elegans*. *Proc Natl Acad Sci U S A* *113*, E1074-81.

Perkins, L. A., Hedgecock, E. M., Thomson, J. N., and Culotti, J. G. (1986). Mutant sensory cilia in the nematode *Caenorhabditis elegans*. *Dev Biol* *117*, 456-487.

Peters, A., and Walsh, T. M. (1972). A study of the organization of apical dendrites in the somatic sensory cortex of the rat. *J Comp Neurol* *144*, 253-268.

Pocock, R., Bénard, C. Y., Shapiro, L., and Hobert, O. (2008). Functional dissection of the *C. elegans* cell adhesion molecule SAX-7, a homologue of human L1. *Mol Cell Neurosci* *37*, 56-68.

Prevedel, R. et al. (2014). Simultaneous whole-animal 3D imaging of neuronal activity using light-field microscopy. *Nat Methods* *11*, 727-730.

Raper, J. A., Bastiani, M. J., and Goodman, C. S. (1984). Pathfinding by neuronal growth cones in grasshopper embryos. IV. The effects of ablating the A and P axons upon the behavior of the G growth cone. *J Neurosci* *4*, 2329-2345.

Sakurai, T. (2012). The role of NrCAM in neural development and disorders--beyond a simple glue in the brain. *Mol Cell Neurosci* *49*, 351-363.

Salzberg, Y., Díaz-Balzac, C. A., Ramirez-Suarez, N. J., Attreed, M., Tecle, E., Desbois, M., Kaprielian, Z., and Bülow, H. E. (2013). Skin-derived cues control arborization of sensory dendrites in *Caenorhabditis elegans*. *Cell* *155*, 308-320.

Sasakura, H., Inada, H., Kuhara, A., Fusaoka, E., Takemoto, D., Takeuchi, K., and Mori, I. (2005). Maintenance of neuronal positions in organized ganglia by SAX-7, a *Caenorhabditis elegans* homologue of L1. *EMBO J* *24*, 1477-1488.

Schmitz, C., Kinge, P., and Hutter, H. (2007). Axon guidance genes identified in a large-scale RNAi screen using the RNAi-hypersensitive *Caenorhabditis elegans* strain *nre-1(hd20) lin-15b(hd126)*. *Proc Natl Acad Sci U S A* *104*, 834-839.

Schmitz, C., Wacker, I., and Hutter, H. (2008). The Fat-like cadherin CDH-4 controls axon fasciculation, cell migration and hypodermis and pharynx development in *Caenorhabditis elegans*. *Dev Biol* *316*, 249-259.

Schrödel, T., Prevedel, R., Aumayr, K., Zimmer, M., and Vaziri, A. (2013). Brain-wide 3D imaging of neuronal activity in *Caenorhabditis elegans* with sculpted light. *Nat Methods* *10*, 1013-1020.

Schwabe, T., Borycz, J. A., and Meinertzhagen, I. A. (2014). Differential adhesion determines the organization of synaptic fascicles in the *Drosophila* visual system. *Current Biology* *24*, 1304-1313.

Senti, G., and Swoboda, P. (2008). Distinct isoforms of the RFX transcription factor DAF-19 regulate ciliogenesis and maintenance of synaptic activity. *Mol Biol Cell* *19*, 5517-5528.

Shen, K., and Bargmann, C. I. (2003). The immunoglobulin superfamily protein SYG-1 determines the location of specific synapses in *C. elegans*. *Cell* *112*, 619-630.

Singhal, A., and Shaham, S. (2017). Infrared laser-induced gene expression for tracking development and function of single *C. elegans* embryonic neurons. *Nat Commun* *8*, 14100.

Sivachenko, A., Li, Y., Abruzzi, K. C., and Rosbash, M. (2013). The transcription factor Mef2 links the *Drosophila* core clock to Fas2, neuronal morphology, and circadian behavior. *Neuron* *79*, 281-292.

Steimel, A., Wong, L., Najarro, E. H., Ackley, B. D., Garriga, G., and Hutter, H. (2010). The Flamingo ortholog FMI-1 controls pioneer-dependent navigation of follower axons in *C. elegans*. *Development* *137*, 3663-3673.

Stiernagle, T. (2006). Maintenance of *C. elegans*. *WormBook* 1-11.

Su, C. Y., Menuz, K., Reisert, J., and Carlson, J. R. (2012). Non-synaptic inhibition between grouped neurons in an olfactory circuit. *Nature* *492*, 66-71.

Sulston, J. E., Schierenberg, E., White, J. G., and Thomson, J. N. (1983). The embryonic cell lineage of the nematode *Caenorhabditis elegans*. *Dev Biol* *100*, 64-119.

Swoboda, P., Adler, H. T., and Thomas, J. H. (2000). The RFX-type transcription factor DAF-19 regulates sensory neuron cilium formation in *C. elegans*. *Mol Cell* *5*, 411-421.

Thompson, O. et al. (2013). The million mutation project: a new approach to genetics in *Caenorhabditis elegans*. *Genome Res* *23*, 1749-1762.

Townes, P. L., and Holtfreter, J. (1955). Directed movements and selective adhesion of embryonic amphibian cells. *Journal of Experimental Zoology* 128, 53-120.

Turing, A. M. (1990). The chemical basis of morphogenesis. 1953. *Bull Math Biol* 52, 153-97; discussion 119.

Walsh, C., and Guillery, R. W. (1984). Fibre order in the pathways from the eye to the brain. *Trends in Neurosciences* 7, 209-211.

Walter, M., Fournier, A., and Reimers, M. (1998). Clonal mosaic model for the synthesis of mammalian coat patterns. *Proceedings of Graphics Interface* 82-91.

Wang, X., Kweon, J., Larson, S., and Chen, L. (2005). A role for the *C. elegans* L1CAM homologue *lad-1/sax-7* in maintaining tissue attachment. *Dev Biol* 284, 273-291.

Ward, S., Thomson, N., White, J. G., and Brenner, S. (1975). Electron microscopical reconstruction of the anterior sensory anatomy of the nematode *Caenorhabditis elegans*. *J Comp Neurol* 160, 313-337.

White, J. G., Southgate, E., Thomson, J. N., and Brenner, S. (1976). The structure of the ventral nerve cord of *Caenorhabditis elegans*. *Philos Trans R Soc Lond B Biol Sci* 275, 327-348.

White, J. G., Southgate, E., Thomson, J. N., and Brenner, S. (1986). The structure of the nervous system of the nematode *Caenorhabditis elegans*. *Philos Trans R Soc Lond B Biol Sci* 314, 1-340.

Wills, Z., Bateman, J., Korey, C. A., Comer, A., and Van Vactor, D. (1999). The tyrosine kinase Abl and its substrate enabled collaborate with the receptor phosphatase Dlar to control motor axon guidance. *Neuron* 22, 301-312.

Yip, Z. C., and Heiman, M. G. (2016). Duplication of a Single Neuron in *C. elegans* Reveals a Pathway for Dendrite Tiling by Mutual Repulsion. *Cell Rep* 15, 2109-2117.

Zallen, J. A., Kirch, S. A., and Bargmann, C. I. (1999). Genes required for axon pathfinding and extension in the *C. elegans* nerve ring. *Development* 126, 3679-3692.

Zallen, J. A., Yi, B. A., and Bargmann, C. I. (1998). The conserved immunoglobulin superfamily member SAX-3/Robo directs multiple aspects of axon guidance in *C. elegans*. *Cell* 92, 217-227.

**Author contributions:**

Z.C.Y. and M.G.H conceived the ideas and designed the experiments. Z.C.Y. performed the experiments and analyzed the data. Z.C.Y. and M.G.H. wrote the manuscript.

**Acknowledgements:**

We thank Tiao Xie and Hunter Elliott of the Harvard Image and Data Analysis Core for writing code for image analysis, and Josh Sanes, Elizabeth Engle, and members of the Heiman lab for comments on the manuscript. We thank the CGC, which is funded by NIH Office of Research Infrastructure Programs (P40 OD010440), and WormBase. We thank David Hall for permission to use Slideable Worm images. This work was supported in part by an NSF Graduate Research Fellowship and Alfred J. Ryan Foundation Fellowship (Z.C.Y) and NIH R01GM108754 and the Harvard Milton Fund (M.G.H.). The authors declare that they have no competing interests.

**Table 1**

| Candidate gene                                                | Protein information and references                                                                                                    | Allele(s)       | Animals with defasciculated amphid bundles (percent, n=50) |
|---------------------------------------------------------------|---------------------------------------------------------------------------------------------------------------------------------------|-----------------|------------------------------------------------------------|
| <b>Mutants with known axon fasciculation/guidance defects</b> |                                                                                                                                       |                 |                                                            |
| <i>dig-1</i>                                                  | Immunoglobulin (Ig) superfamily; among largest secreted proteins in any animal (~1300 kDa) (Burket et al., 2006; Bénard et al., 2006) | <i>n1321</i>    | 24                                                         |
| <i>ptp-3</i>                                                  | LAR family protein tyrosine phosphatase (Ackley et al., 2005; Ch'ng et al., 2003)                                                     | <i>mu256</i>    | 14                                                         |
|                                                               |                                                                                                                                       | <i>ok244</i>    | 0                                                          |
| <i>sax-7<sup>a</sup></i>                                      | L1 family/Neuroglian (Sasakura et al., 2005; Wang et al., 2005; Zallen et al., 1999)                                                  | <i>ky146</i>    | 12                                                         |
| <i>vab-1</i>                                                  | sole Eph receptor in <i>C. elegans</i> (George et al., 1998; Mohamed and Chin-Sang, 2006; Zallen et al., 1999)                        | <i>dx31</i>     | 10 <sup>b</sup>                                            |
| <i>sax-3</i>                                                  | Robo (Slit receptor) (Zallen et al., 1998; Zallen et al., 1999)                                                                       | <i>ky123</i>    | 8 <sup>b</sup>                                             |
| <i>cdh-4<sup>a</sup></i>                                      | Fat-like cadherin (Schmitz et al., 2008)                                                                                              | <i>rh310</i>    | 6                                                          |
| <i>unc-40<sup>a</sup></i>                                     | DCC (Netrin receptor) (Hedgecock et al., 1990)                                                                                        | <i>e271</i>     | 2                                                          |
| <i>fmi-1<sup>a</sup></i>                                      | Cadherin family (Najarro et al., 2012; Steimel et al., 2010)                                                                          | <i>rh308</i>    | 0                                                          |
| <i>dgn-1<sup>a</sup></i>                                      | Dystroglycan family (Johnson et al., 2006; Johnson and Kramer, 2012)                                                                  | <i>cg121</i>    | 0                                                          |
| <i>syg-1<sup>a</sup></i>                                      | IrreC/IRRE family (Shen and Bargmann, 2003)                                                                                           | <i>ky652</i>    | 0                                                          |
| <i>casy-1</i>                                                 | Calsyntenin family (Kim and Emmons, 2017)                                                                                             | <i>ok739</i>    | 0                                                          |
| <b>Other adhesion molecules enriched in amphid neurons</b>    |                                                                                                                                       |                 |                                                            |
| <i>nrx-1<sup>a</sup></i>                                      | Neurexin family (Haklai-Topper et al., 2011)                                                                                          | <i>wy778</i>    | 2                                                          |
| <i>plx-2<sup>a</sup></i>                                      | Plexin (Semaphorin receptor) (Ikegami et al., 2004; Nakao et al., 2007)                                                               | <i>ev773</i>    | 0                                                          |
| <i>nlr-1<sup>a</sup></i>                                      | Neurexin/Caspr family (Haklai-Topper et al., 2011)                                                                                    | <i>tm2050</i>   | 0                                                          |
| <i>ptp-4<sup>a</sup></i>                                      | protein tyrosine phosphatase (Thompson et al., 2013)                                                                                  | <i>gk715362</i> | 0                                                          |
| <i>rig-3<sup>a</sup></i>                                      | Ig superfamily (Consortium, 2012)                                                                                                     | <i>ok2156</i>   | 0                                                          |
| <i>scd-2<sup>a</sup></i>                                      | Receptor tyrosine kinase (Consortium, 2012)                                                                                           | <i>ok565</i>    | 0                                                          |
| <i>igcm-1<sup>a</sup></i>                                     | Ig superfamily (Consortium, 2012)                                                                                                     | <i>ok711</i>    | 0                                                          |
| <b>Factors that physically interact with SAX-7</b>            |                                                                                                                                       |                 |                                                            |
| <i>dma-1<sup>a</sup></i>                                      | Leucine-rich repeat family (Liu and Shen, 2011)                                                                                       | <i>wy686</i>    | 0                                                          |
| <i>mnr-1</i>                                                  | Fam151 family (Dong et al., 2013; Salzberg et al., 2013)                                                                              | <i>wy758</i>    | 0                                                          |

**Table 1. Candidate screen to identify factors required for amphid dendrite fasciculation.**

Candidate genes were selected from the literature based on known roles in axon fasciculation/guidance, enrichment in amphid neurons (<sup>a</sup>enriched in AWB or AFD, (Colosimo et al., 2004)), or physical interaction with SAX-7, as shown. Animals bearing the designated alleles were subjected to dye-filling, which brightly labels six amphid neurons (AWB, ASH, ASI, ASJ, ASK, ADL), and scored with a fluorescence stereomicroscope for defasciculated amphid bundles. Two mutants exhibited gross head morphology defects concomitant with defasciculation and were not pursued further (<sup>b</sup>gross head morphology defects).

Figure 1

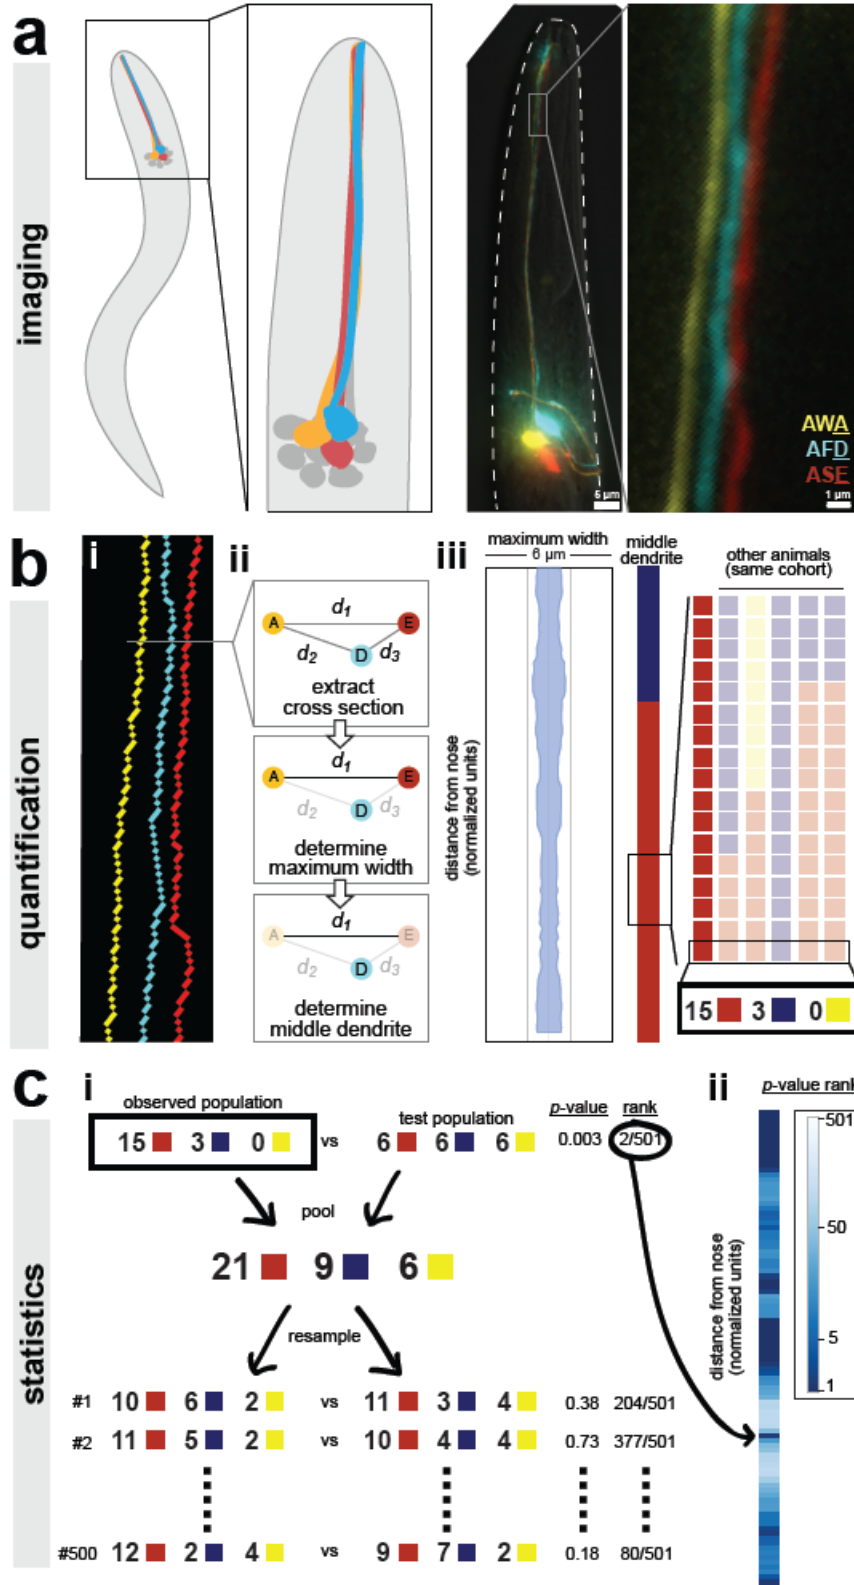

**Fig. 1. A semi-automated method for quantifying dendrite order**

Our analysis pipeline can be divided into three parts: (A) imaging, (B) quantification, and (C) statistics. (A) Schematic showing position of amphid neurons in head and maximum-intensity projection of an animal expressing YFP, CFP, and mCherry in AWA, AFD, and ASE, respectively. Nose tip is at top. (B) (i) To quantify dendrite order, a brightest-path algorithm first extracts the 3D coordinates of each dendrite. (ii) In cross-section, the dendrites define a triangle (A, AWA; D, AFD; E, ASE). The pairwise distances between dendrites are determined ( $d_1$ ,  $d_2$ ,  $d_3$ ). The longest distance is taken as a proxy for bundle width ( $d_1$  in the schematic). The dendrite opposite the longest side is defined as the dendrite "in the middle" of the others (AFD in the schematic). (iii) For visualization, bundle width is plotted at each position along the bundle. The dendrite in the middle is plotted as a color bar (yellow, AWA; blue, AFD; red, ASE). Color bars from age- and genotype-matched individuals are arranged side-by-side to visualize patterns of dendrite order in a population. For simplicity, only six bundles are illustrated, representing  $n=18$  as shown. (C) (i) For statistical testing, the observed distribution is compared to a test distribution using Fisher's  $3 \times 2$  exact test as a test statistic to obtain a nominal "true"  $p$ -value. Permutation testing is carried out by merging observed and test distributions and resampling 500 times, to obtain representative  $p$ -values for distributions with the same composition that differ only by sampling error. The "true"  $p$ -value is ranked relative to these resampled  $p$ -values, with lower rankings (1/501) indicating the true distributions differ more than would be expected by sampling error. (ii) This comparison is carried out at every position along the bundle and the  $p$ -value rankings are represented as a log-scale color bar.



Figure 2

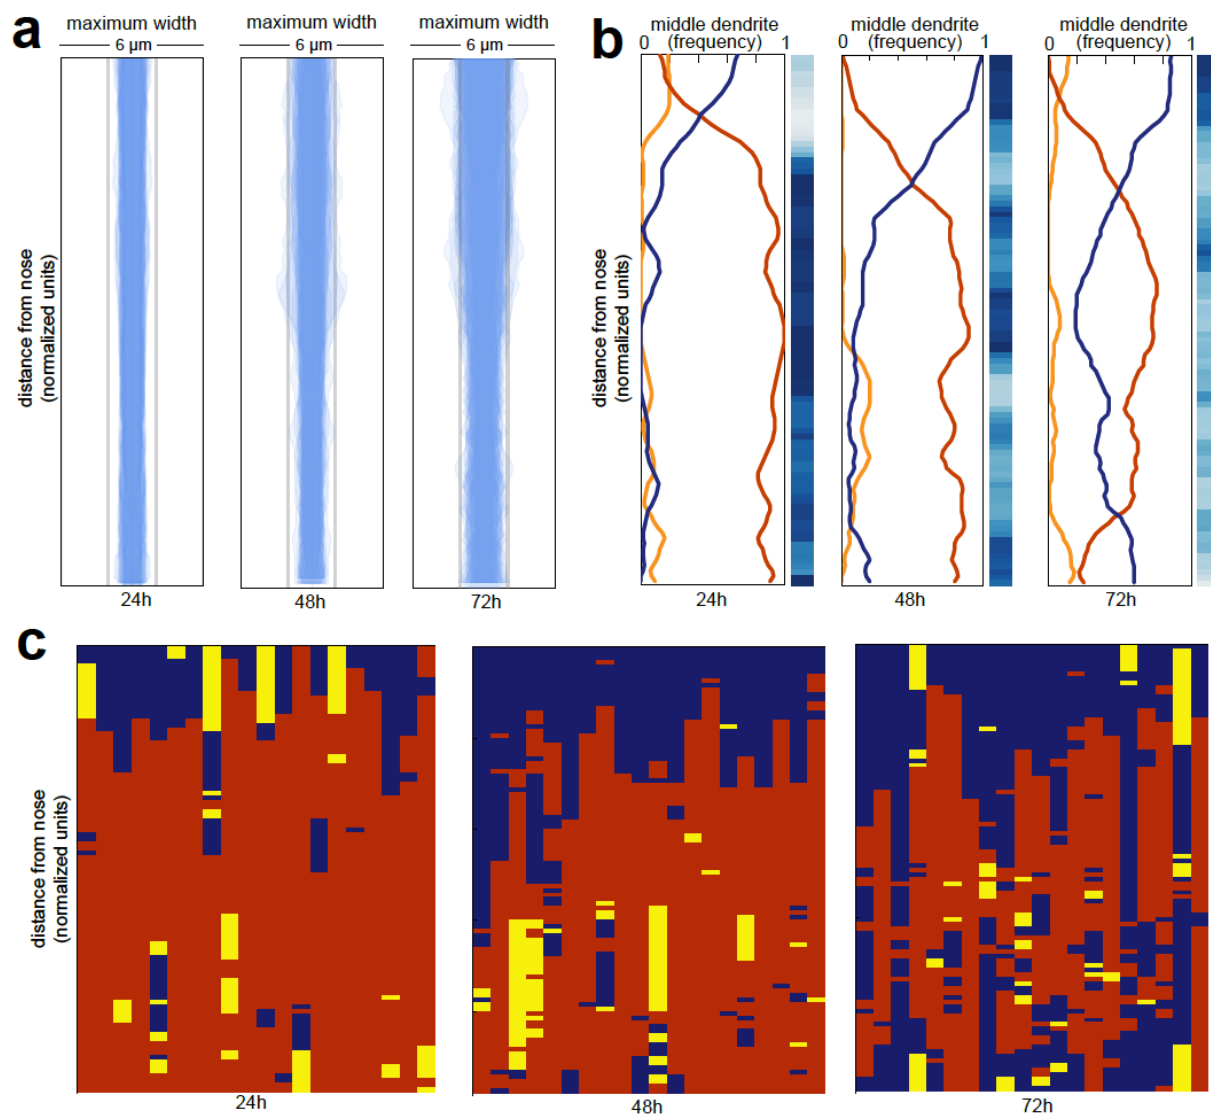

**Fig. 2. Wild-type dendrite bundles are tightly fasciculated and well ordered**

(A) Maximum distances between AWA, AFD, and ASE dendrites for early stage larvae (24h, L2/L3), late stage larvae (48h, L4), and young adults (72h, one-day adults). Light gray bars, 2  $\mu\text{m}$  width; entire box, 6  $\mu\text{m}$  width. (B) Summary plots showing the fraction of animals with AWA (yellow), AFD (blue), or ASE (red) dendrites in the middle at each position along the bundle for 24h, 48h, and 72h time points. Blue color bars show statistical difference from a random distribution (ranked  $p$ -values, shading as in Fig. 1Cii); darker shades represent greater difference from random. See Supp. Fig. S1A for comparison with chi-squared test  $p$ -values. (C) Population plots showing dendrite "in the middle" for 24h, 48h, and 72h time points (AWA, yellow; AFD, blue; ASE, red); same data as in (B). Each column represents one animal.  $n=20$  at each time point.

Figure 3

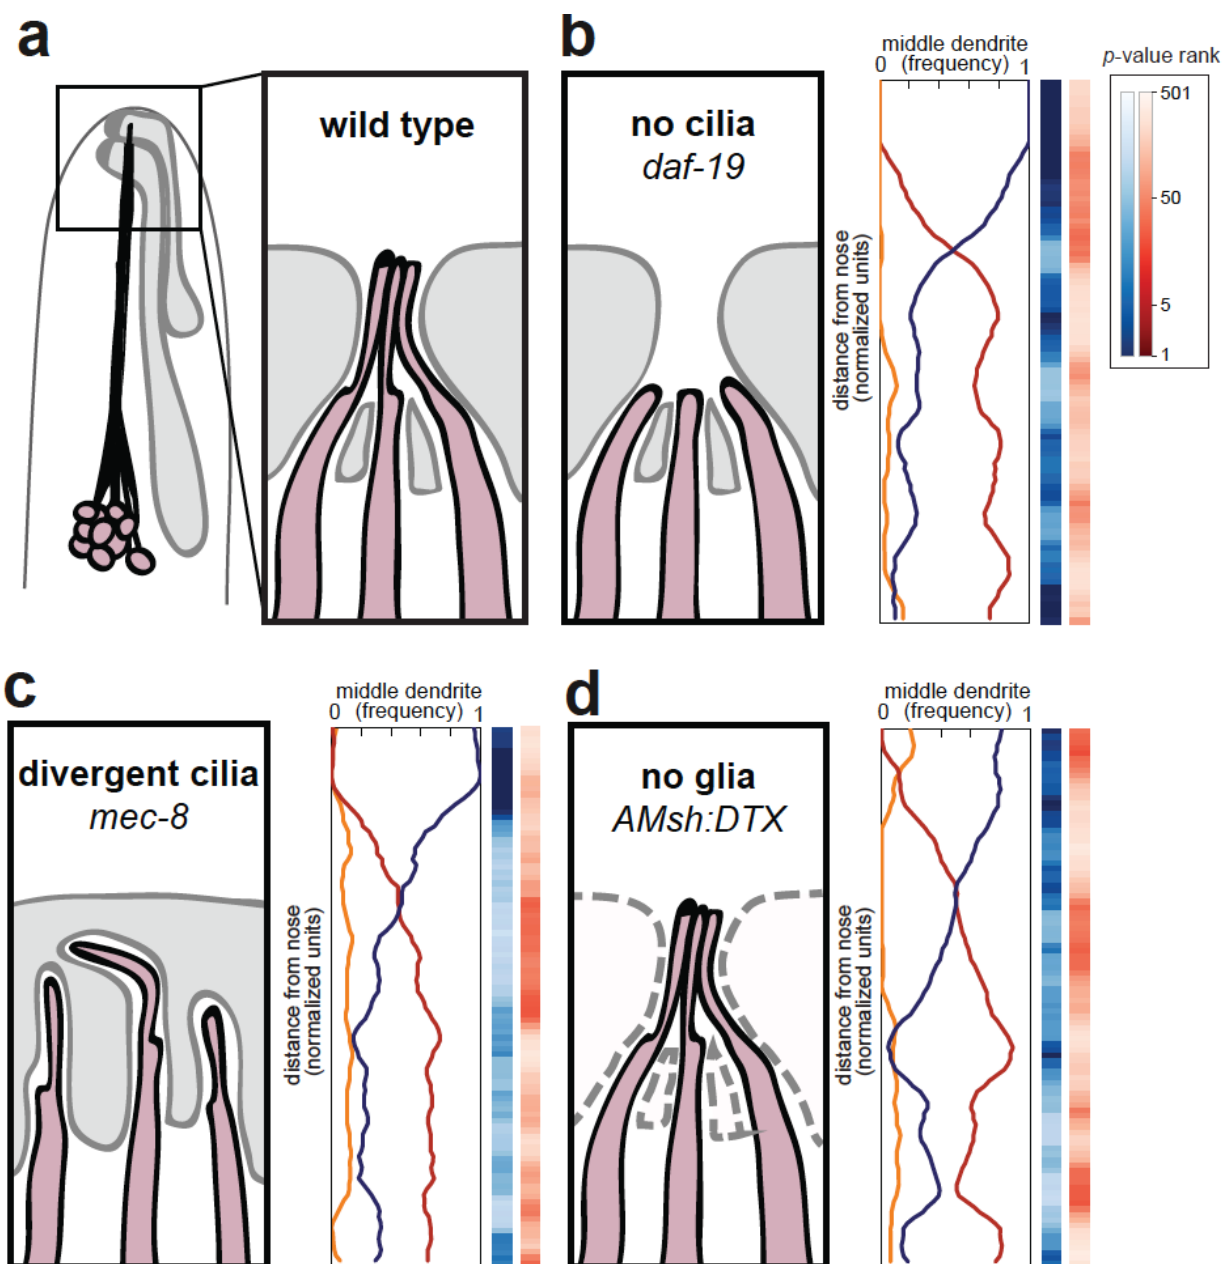

**Fig. 3. Amphid cilia and sheath glia are not required for dendrite order**

(A) Schematic of wild-type amphid neurons (dark pink) and glial cells (gray). Inset: Amphid dendrites protrude into the sheath glial cell and terminate in cilia. (B-D) Dendrite order summary plots for 48h (L4) animals with (B) no cilia (*daf-19(m86);daf-12(sa204)*, n=20); (C) divergent cilia (*mec-8(u74)*, n=19) or (D) no sheath glia (*AMsh:DTX*, transgene consisting of diphtheria toxin A under control of amphid sheath glial specific promoter, n=20). Color bars, *p*-value rankings as indicated in key. Blue bars show statistical difference from random (darker shading, less random); red bars show statistical difference from wild type (darker shading, less like wild type).

Figure 4

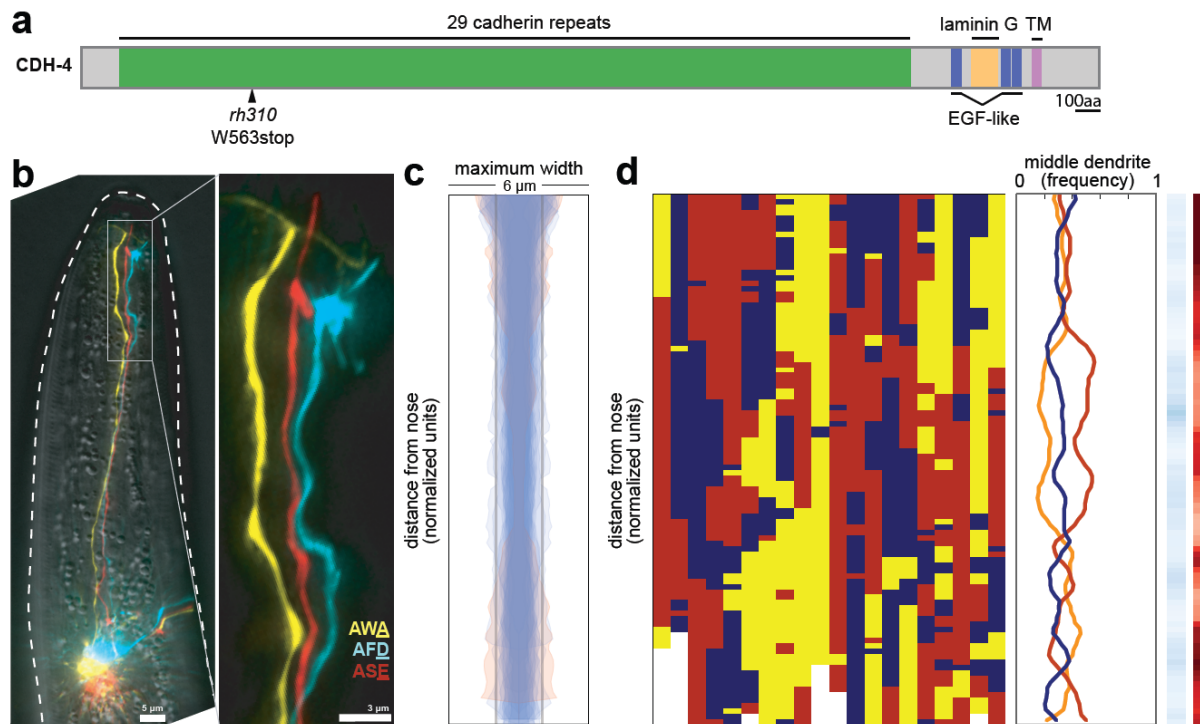

**Fig. 4. *cdh-4* mutants exhibit loss of dendrite order**

(A) Schematic CDH-4 protein structure. TM, transmembrane segment; EGF-like, epidermal growth factor-like domain. (B) Maximum-intensity projection of 48h (L4) animal showing defasciculated dendrites near nose tip. (C) Bundle width plots for *cdh-4* (48h, L4; n=21). One individual (shown in (B)) with defasciculated dendrites is overlaid in pink and was excluded from further analysis. All other animals (n=20) did not have defasciculated dendrites and are overlaid in blue. (D) Population plots and summary plots showing dendrite order for these animals (n=20). *p*-value rankings as in Fig. 3: blue, *cdh-4* vs. random; red, *cdh-4* vs. wild type; darker shading represents greater differences between the populations.

Figure 5

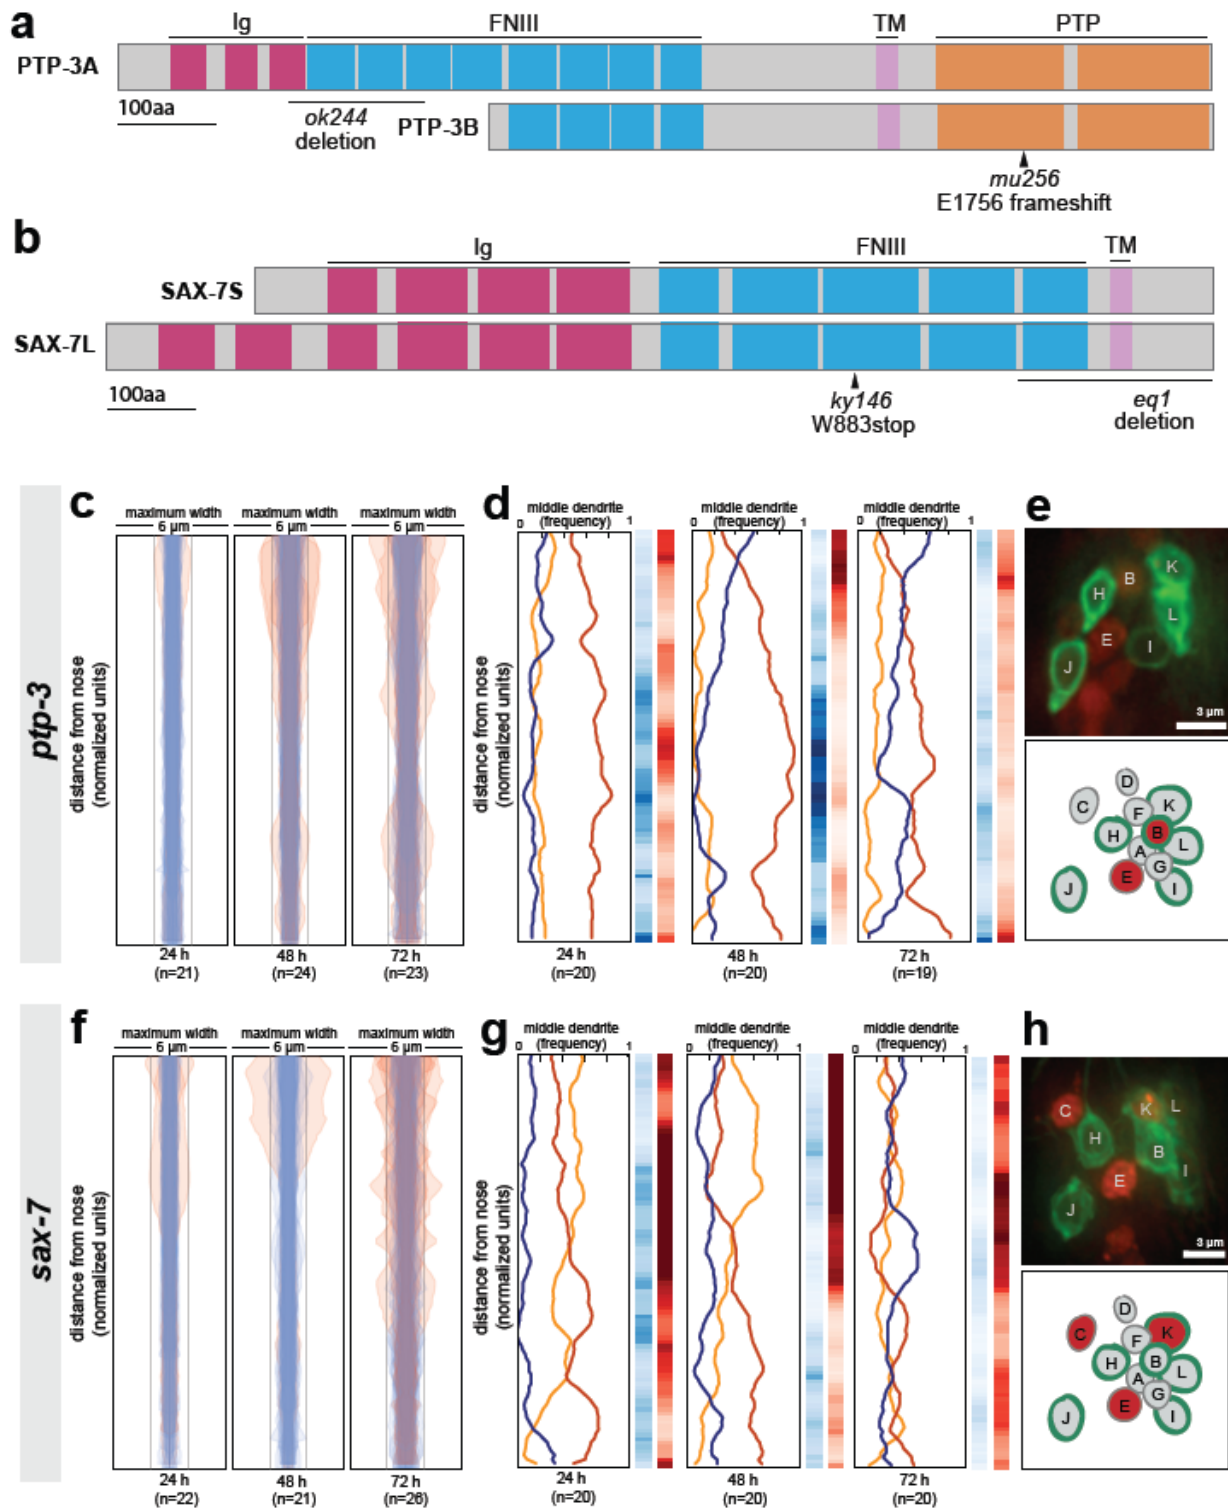

**Fig. 5. Loss of either *ptp-3* or *sax-7* alters dendrite order in young animals**

(A-B) Schematic protein structures for isoforms of (A) PTP-3 and (B) SAX-7. TM, transmembrane segment; FNIII, Fibronectin Type III domain; Ig, immunoglobulin-like domain; PTP, protein tyrosine phosphatase domain. (C, D, F, G) Bundle width plots and dendrite order summary plots for (C, D) *ptp-3(mu256)* and (F, G) *sax-7(ky146)* at the developmental stages indicated. Animals with defasciculated dendrites are overlaid in pink on bundle width plots and were excluded from further analysis. (E, H) Expression patterns of (E) *ptp-3b* promoter and (H) *sax-7S* promoter driving nuclear mCherry (red). Dye-filling (green) was used to label six defined neurons as anatomical landmarks, and remaining neurons were identified by nuclei positions. Maximum-intensity projection images of L1-stage animals, top; schematic showing defined relative positions of amphid nuclei, bottom. A, AWA; B, AWB; C, AWC; D, AFD; E, ASE; F, ADF; G, ASG; H, ASH; I, ASI; J, ASJ; K, ASK; L, ADL.

Figure 6

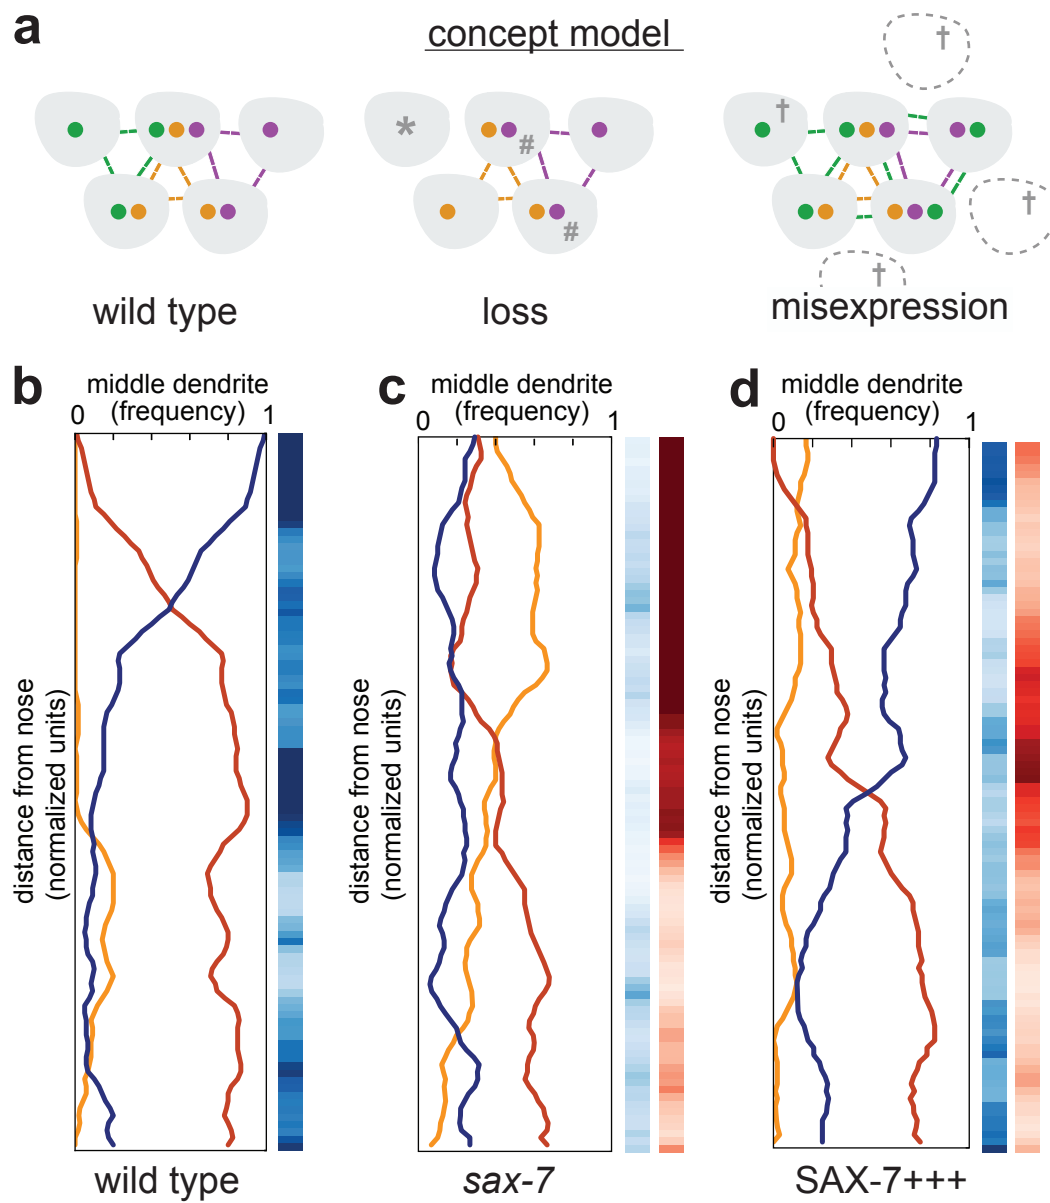



**Fig. 6. Misexpression of SAX-7 in all amphid neurons alters dendrite order**

(A) Concept model illustrating how differential expression of adhesion molecules (green, orange, purple) might lead to a stereotyped arrangement of dendrites (gray). In this version, loss of the green adhesion molecule might cause defasciculated dendrites (\*) and more variable order due to dendrites becoming equivalent (#). Misexpression of the green adhesion molecule might lead to more variable order or to a different order due to altered partner preferences (†). (B-D) Dendrite order summary plots and statistical tests comparing (B) wild type (n=20; same data as Fig. 2B), (C) *sax-7(ky46)* (n=20; same data as Fig. 5G), and (D) SAX-7 misexpression (SAX-7<sup>+++</sup>, *osm-6pro:SAX-7S*, n=18). 48 h (L4) animals. *p*-value rankings as in Fig. 3: blue, indicated strain vs. random; red, indicated strain vs. wild type; darker shading represents greater differences between the populations.

**Table S1. Strains used in this study**

| <b>Strain</b> | <b>Genotype</b>                                        | <b>Figure first referenced</b> |
|---------------|--------------------------------------------------------|--------------------------------|
| CHB1963       | <i>hmnIs23 III; hmnIs17 V</i>                          | Fig. 1                         |
| CHB2429       | <i>hmnIs23 III; hmnEx1328</i>                          | Fig. S1                        |
| CHB2305       | <i>daf-19(m86)II; hmnIs23 III; hmnIs17 V; (sa204)X</i> | Fig. 3                         |
| CHB2044       | <i>mec-8(u74)I; hmnIs23 III; hmnIs17 V</i>             | Fig. 3                         |
| CHB2258       | <i>hmnIs23 III; hmnIs17 V; hmnEx1234</i>               | Fig. 3                         |
| CHB284        | <i>dig-1(n1321)III</i>                                 | Table 1                        |
| CHB1000       | <i>ptp-3(mu256)II</i>                                  | Table 1                        |
| CHB286        | <i>sax-7(ky146)IV; kyIs4 X</i>                         | Table 1                        |
| CHB182        | <i>vab-1(dx31)II</i>                                   | Table 1                        |
| CHB178        | <i>sax-3(ky123)X</i>                                   | Table 1                        |
| CHB597        | <i>cdh-4(rh310) rhIs4 III</i>                          | Table 1                        |
| CHB2245       | <i>trIs78; nrx-1(wy778)V</i>                           | Table 1                        |
| CHB169        | <i>unc-40(e271)I</i>                                   | Table 1                        |
| CHB994        | <i>dma-1(wy686)I; wyIs378 X</i>                        | Table 1                        |
| CHB1006       | <i>ptp-3(ok244)II</i>                                  | Table 1                        |
| CHB848        | <i>igcm-1(ok711)X</i>                                  | Table 1                        |
| CHB1005       | <i>plx-2(ev773)II; him-5(e1490)V</i>                   | Table 1                        |
| CHB1020       | <i>nlr-1(tm2050)IV/nT1[qIs51] IV; +/-nT1 V</i>         | Table 1                        |
| CHB2244       | <i>wyIs592 III; mnr-1(wy758)V</i>                      | Table 1                        |
| CHB1202       | <i>ptp-4(gk715362)IV; hmnEx598</i>                     | Table 1                        |
| CHB999        | <i>kyIs235 V; syg-1(ky652)X</i>                        | Table 1                        |
| CHB596        | <i>rhIs4 hdIs26 III; fmi-1(rh308)V</i>                 | Table 1                        |
| CHB1008       | <i>casy-1(ok739)II</i>                                 | Table 1                        |

|         |                                                               |               |
|---------|---------------------------------------------------------------|---------------|
| CHB1007 | <i>scd-2(ok565)V</i>                                          | Table 1       |
| CHB1010 | <i>rig-3(ok2156)X</i>                                         | Table 1       |
| CHB998  | <i>dgn-1(cg121)X; cgEx308</i>                                 | Table 1       |
| CHB2647 | <i>cdh-4(rh310)III; hmnIs17 V; hmnEx1486</i>                  | Fig. 4        |
| CHB2646 | <i>hmnIs17 V; hmnEx1486</i>                                   | Fig. 4        |
| CHB2087 | <i>ptp-3(mu256)II; hmnIs23 III; hmnIs17 V</i>                 | Fig. 5        |
| CHB1840 | <i>hmnEx1021</i>                                              | Fig. 5        |
| CHB2060 | <i>hmnIs23 III; sax-7(ky146)IV; hmnIs17 V</i>                 | Fig. 5        |
| CHB1687 | <i>hmnEx912</i>                                               | Fig. 5        |
| CHB2116 | <i>ptp-3(ok244)II; hmnIs23 III; hmnIs17 V</i>                 | Supp. Fig. S3 |
| CHB2526 | <i>hmnIs23 III; sax-7(eq1)IV; hmnIs17 V</i>                   | Supp. Fig. S3 |
| CHB2283 | <i>dma-1(wy686)I; hmnIs23 III; hmnIs17 V</i>                  | Supp. Fig. S3 |
| CHB2503 | <i>clr-1(e1745)II; hmnIs23 III; hmnIs17 V</i>                 | Supp. Fig. S3 |
| CHB2155 | <i>hmnIs23 III; hmnIs17 V; igcm-1(ok711)X</i>                 | Supp. Fig. S3 |
| CHB2350 | <i>ptp-3(mu256)II; hmnIs23 III; sax-7(ky146)IV; hmnIs17 V</i> | Supp. Fig. S3 |
| CHB2407 | <i>hmnIs23 III; hmnIs17 V; hmnEx1291</i>                      | Fig. 6        |

**Table S2. Transgenes used in this study**

**Integrated:**

| Allele(s)          | Constructs                                                                                    | References and Notes                         |
|--------------------|-----------------------------------------------------------------------------------------------|----------------------------------------------|
| <i>hdlIs26III</i>  | <i>odr-2</i> pro:CFP, <i>sra-6</i> pro:DsRed2                                                 | (Steimel et al., 2010)                       |
| <i>hmnIs17 V</i>   | pCY31, pMH130, pMH91                                                                          | This study                                   |
| <i>hmnIs23 III</i> | pCY30, pDPMM051                                                                               | This study                                   |
| <i>kyIs4 X</i>     | <i>ceh-23</i> pro:GFP, <i>lin-15</i> (+)                                                      | (Zallen et al., 1999)                        |
| <i>kyIs235 V</i>   | <i>odr-1</i> pro:RFP, <i>unc-86</i> pro:VAMP-YFP, <i>unc-4</i> pro: <i>lin-10</i> -RFP intron | (Shen and Bargmann, 2003)                    |
| <i>rhIs4 III</i>   | <i>glr-1</i> pro:GFP, <i>dpy-20</i> (+)                                                       | (Schmitz et al., 2008; Steimel et al., 2010) |
| <i>trIs78</i>      | pPRGS698, pPRGS699, pPRGS382                                                                  | (Maro et al., 2015)                          |
| <i>wyIs378 III</i> | pOL020, pOL090, <i>odr-1</i> pro:RFP                                                          | (Liu and Shen, 2011)                         |
| <i>wyIs592 III</i> | pOL020, <i>odr-1</i> pro:RFP                                                                  | (Dong et al., 2013)                          |

**Extrachromosomal:**

| Allele(s)        | Constructs                  | References and Notes   |
|------------------|-----------------------------|------------------------|
| <i>cgEx308</i>   | pJK600, pJK602, pRF4        | (Johnson et al., 2006) |
| <i>hmnEx598</i>  | pCY13, pCY14, pMH91, pMH130 | This study             |
| <i>hmnEx912</i>  | pCY74, pCY134               | This study             |
| <i>hmnEx1021</i> | pCY74, pCY152               | This study             |
| <i>hmnEx1234</i> | pBS, pCY167, pCY168, pIL53  | This study             |
| <i>hmnEx1291</i> | pBS, pCY168, pCY190         | This study             |
| <i>hmnEx1328</i> | pCY50, pCY56, pCY168        | This study             |
| <i>hmnEx1486</i> | pCY30, pCY168               | This study             |

**Table S3. Plasmids used in this study**

| <b>Plasmid</b> | <b>Description</b>                | <b>Notes</b>               |
|----------------|-----------------------------------|----------------------------|
| pBS            | Bluescript                        |                            |
| pCY13          | <i>odr-10</i> pro:CFP             | This study                 |
| pCY14          | <i>gcy-8</i> pro:YFP              | This study                 |
| pCY30          | <i>odr-10</i> pro:YFP             | This study                 |
| pCY31          | <i>gcy-8</i> pro:CFP              | This study                 |
| pCY50          | <i>odr-1</i> pro:CFP              | This study                 |
| pCY56          | <i>ops-1</i> pro:mCherry          | This study                 |
| pCY74          | <i>pha-4</i> pro:YFP              | This study                 |
| pCY134         | <i>sax-7</i> pro:NLS-mCherry-NLS  | This study                 |
| pCY152         | <i>ptp-3b</i> pro:NLS-mCherry-NLS | This study                 |
| pCY167         | <i>F16F9.3</i> pro:DTX            | This study                 |
| pCY168         | <i>unc-122</i> pro:RFP            | This study                 |
| pCY190         | <i>osm-6</i> pro:SAX-7S           | This study                 |
| pDPMM051       | <i>unc-119(+)</i>                 | (Maduro and Pilgrim, 1995) |
| pIL53          | <i>F16F9.3</i> pro:mApple         | I. Low, unpublished        |
| pJK600         | <i>dgn-1</i> genomic region       | (Johnson et al., 2006)     |
| pJK602         | <i>dgn-1</i> pro:GFP              | (Johnson et al., 2006)     |
| pMH91          | <i>gcy-7</i> pro:mCherry          | This study                 |
| pMH130         | <i>gcy-5</i> pro:mCherry          | This study                 |
| pOL020         | <i>ser-2</i> prom3:myrGFP         | (Dong et al., 2013)        |
| pOL090         | <i>rab-3</i> pro:mCherry          | (Liu and Shen, 2011)       |

Dendrite order in *C. elegans*

Yip and Heiman

|          |                                 |                      |
|----------|---------------------------------|----------------------|
| pPRGS382 | <i>myo-2</i> pro:mCherry        | (Maro et al., 2015)  |
| pPRGS698 | <i>unc-129</i> msp:MADD-4A::YFP | (Maro et al., 2015)  |
| pPRGS699 | <i>unc-129</i> msp:MADD-4B::YFP | (Maro et al., 2015)  |
| pRF4     | <i>rol-6</i> ( <i>su1006</i> )  | (Mello et al., 1991) |

Supplemental Figure S1

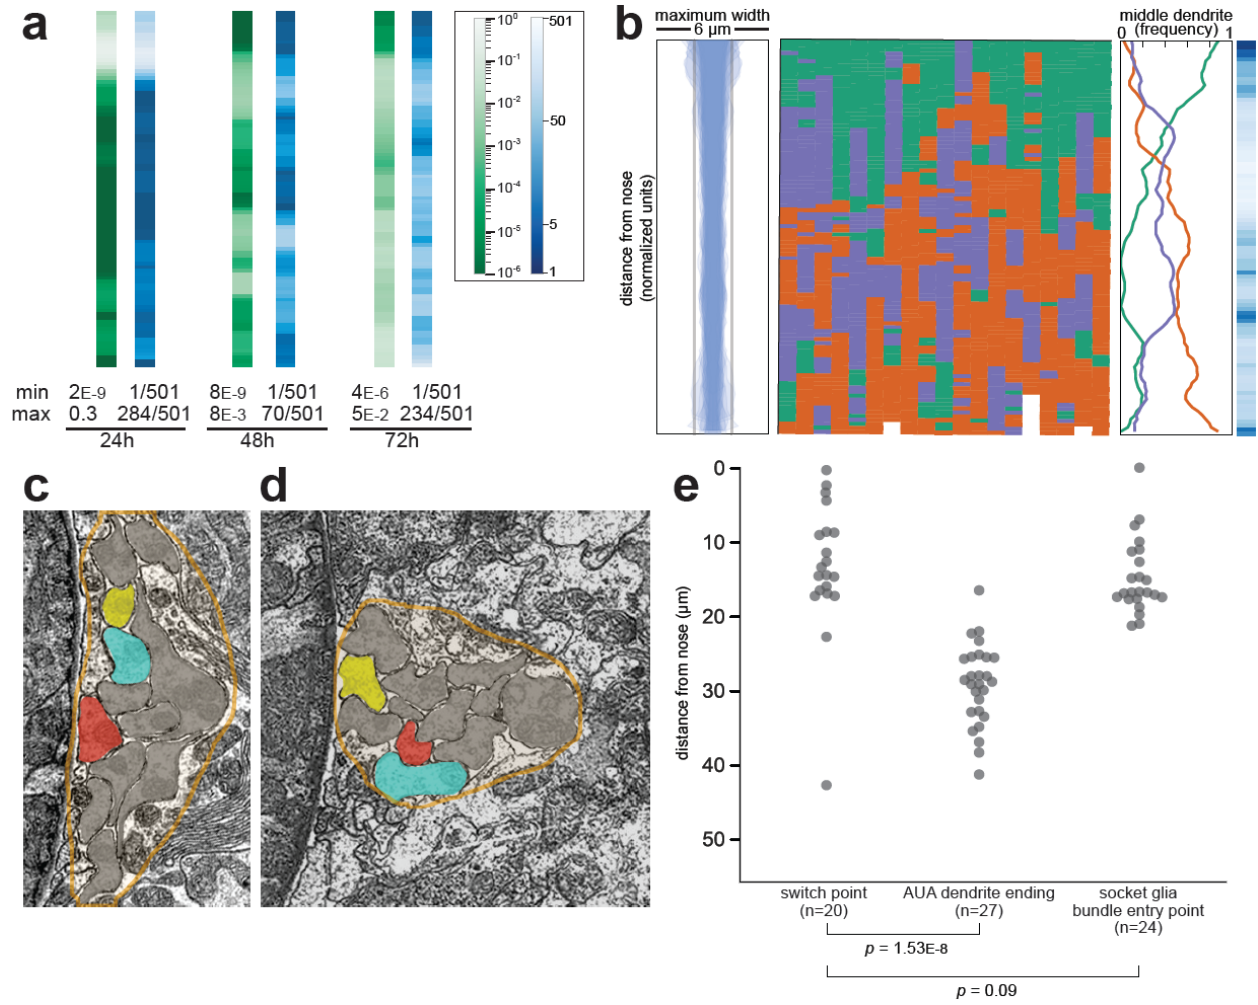

**Supp. Fig. S1. Dendrite order in wild-type animals**

(A) Comparison of chi-squared (green) and ranked  $p$ -value (blue) methods for quantifying statistical differences between wild-type and random populations (see Methods). Data represent wild-type animals at 24h, 48h, and 72h time points (same dataset as Fig. 2). For each method, the minimum (least similar to random) and maximum (most similar to random) scores along the bundle are indicated. (B) Dendrite bundle width, dendrite order population plot, and summary plot for wild-type 48h (L4 stage) animals obtained using a different set of three neurons: green, AWA:YFP; purple, AWC:CFP; red, ASG:mCherry.  $n=19$ . (C, D) Electron micrographs from "Slideable Worm" (SW) (Altun and Hall, 2005) showing sections from an adult animal close to the nose (C, SW slice 18) and farther along the bundle (D, SW slice 50). Amphid dendrites are traced in gray except AFD (blue), AWA (yellow), ASE (red). The overall shape of the amphid bundle is traced in orange. The switch from AFD (blue) to ASE (red) as the middle dendrite can be compared to the change in overall compactness of the bundle. (E) Swarmplot of measurements from wild-type L4 animals showing distances from the dendrite endings to the switch point (left column), from the nose tip to the end of AUA (middle column), and from the dendrite endings to the position where the amphid socket (AMso) joins the amphid bundle (right column).



Supplemental Figure S2

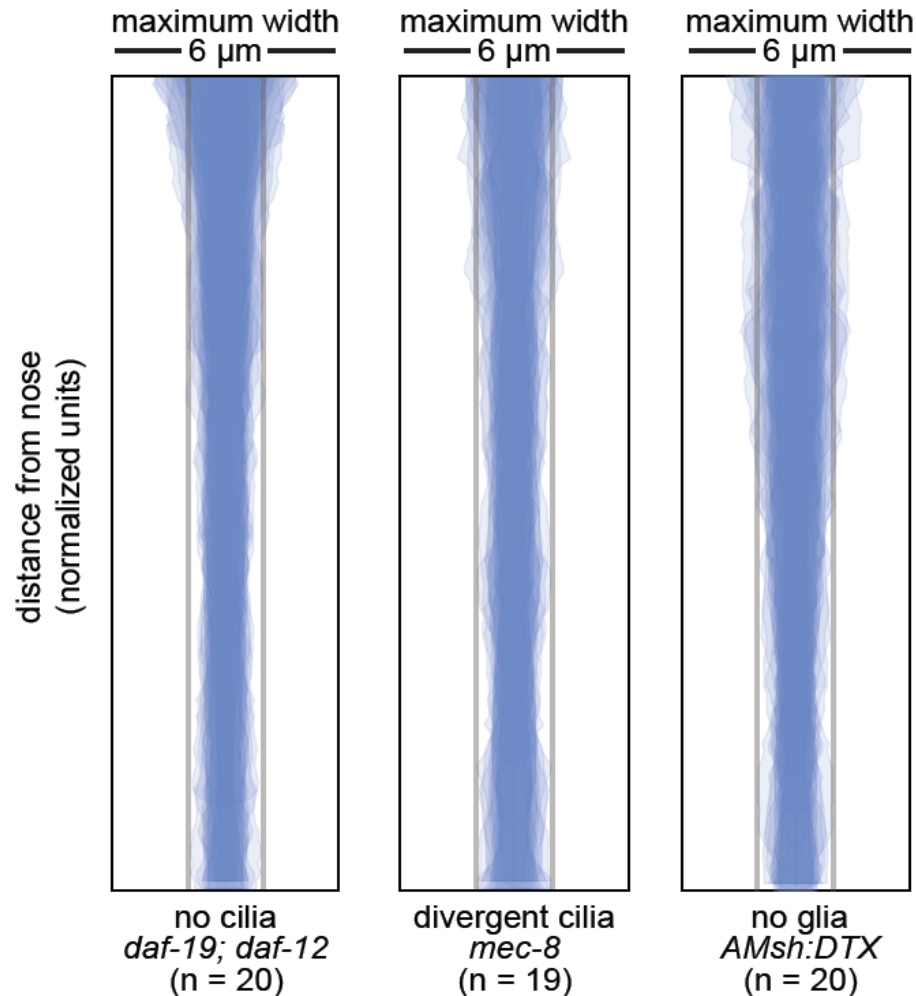

**Supp. Fig. S2. Loss of cilia or glia does not affect fasciculation**

Bundle width plots for 48h (L4) animals with no cilia (*daf-19(m86);daf-12(sa204)*, n=20); divergent cilia (*mec-8(u74)*, n=19) or no sheath glia (*AMsh:DTX*, transgene consisting of diphtheria toxin A under control of amphid sheath glial specific promoter, n=20). Same animals as Fig. 3.

Supplemental Figure S3

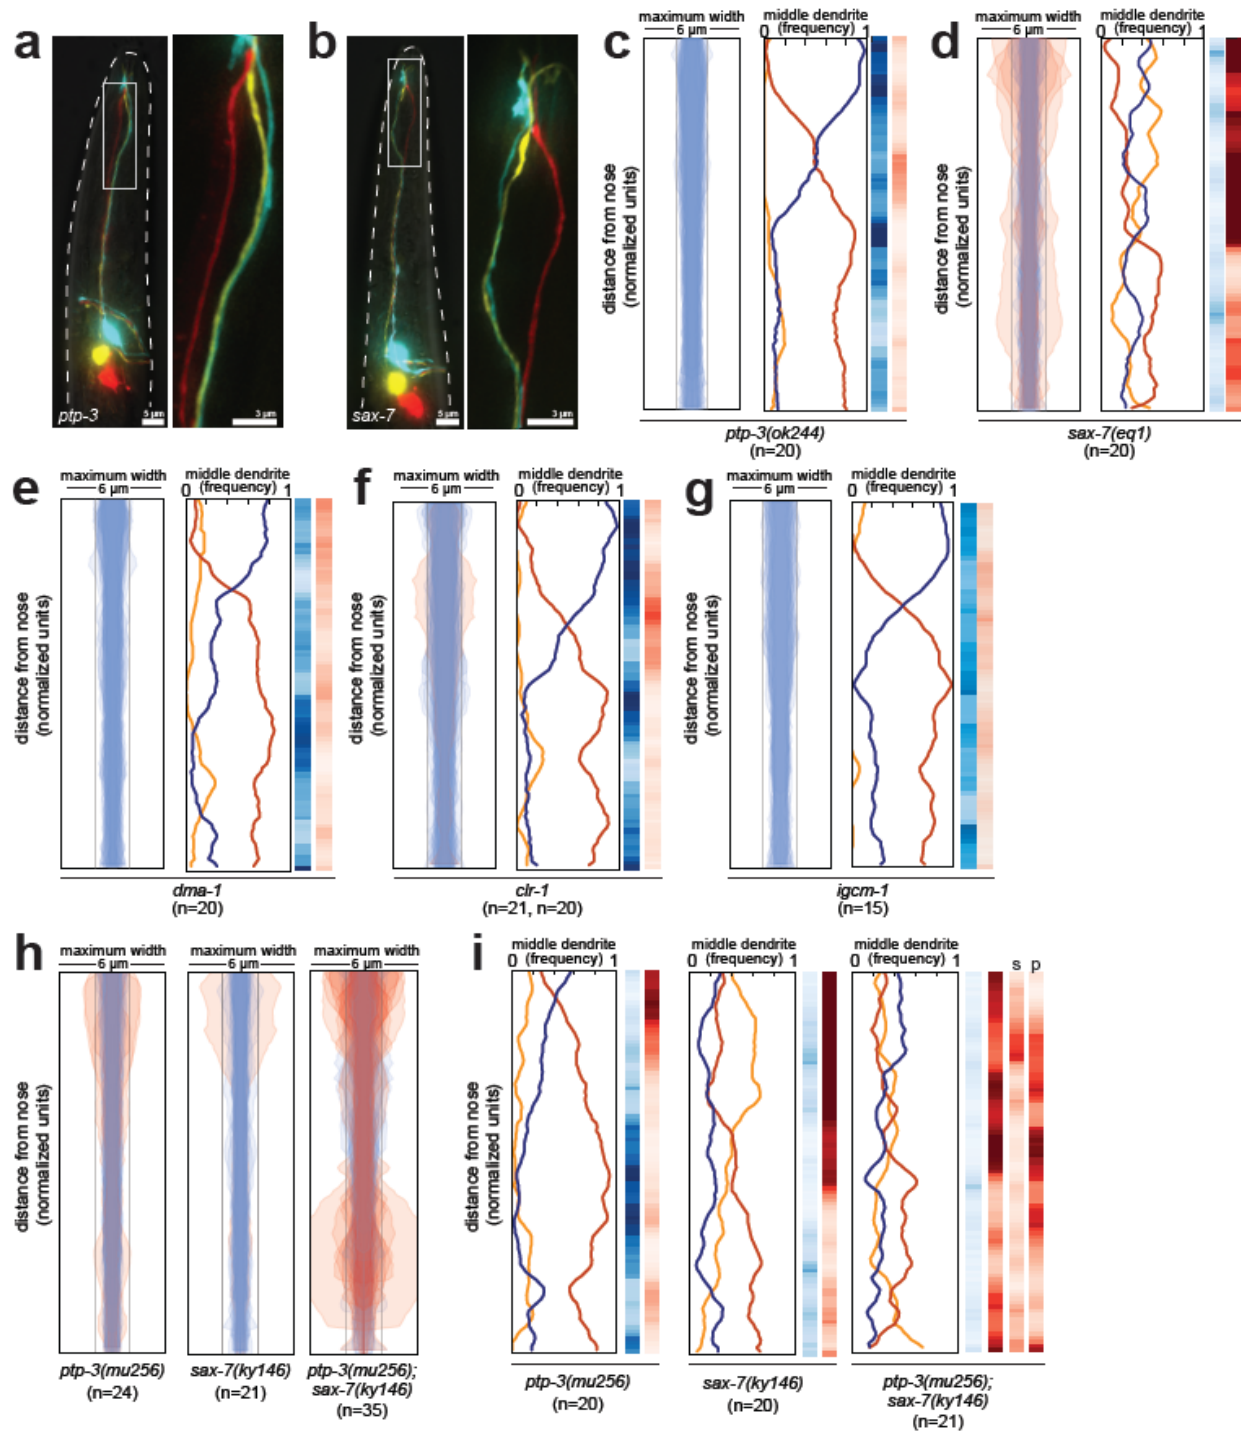

**Supp. Fig. S3. Fasciculation and dendrite order phenotypes in mutants disrupting *ptp-3*, *sax-7*, and SAX-7-interacting factors.**

(A, B) Maximum-intensity projection images showing examples of defasciculation in (A) *ptp-3(mu256)* and (B) *sax-7(ky146)*. Blue, AFD; yellow, AWA; red, ASE. (C-H) Bundle width plots and dendrite order summary plots for (C) *ptp-3(ok244)* which is predicted to disrupt only the PTP-3A isoform; (D) *sax-7(eq1)* which is predicted to disrupt both SAX-7 isoforms, similar to *sax-7(ky146)*; and factors that interact physically or genetically with SAX-7 or its homologs in other contexts (E) *dma-1*, (F) *clr-1*, (G) *igcm-1*. For each strain, *p*-value rankings are shown as in Fig. 3: blue, indicated strain vs. random; red, indicated strain vs. wild type; darker shading represents greater differences between the populations. (H) Bundle width and (I) dendrite order summary plots comparing *ptp-3(mu256)* and *sax-7(ky146)* mutants with the *ptp-3(mu256); sax-7(ky146)* double mutant. For bundle width plots, individuals with defasciculated dendrites are overlaid in pink and were excluded from further analysis. For each strain, *p*-value rankings are shown as described above (blue, strain vs. random; red, strain vs. wild type) except the double mutant is also compared to the *sax-7* (red, s) and *ptp-3* (red, p) single mutants. All data are from 48 h (L4) stage animals.
